# Supplementary material for: The Response of Paracoccidioides lutzii to the Interaction with Human Neutrophils
Source: MDPI journal article supplement (doi:10.3390/jof9111088), 2023-11-07
Supplement: s1 [file s1]

**Supplementary Table S3: Decreased proteins after 2 h and/or 4 h of neutrophil interaction**

| Accession<br>number <sup>a</sup>   | Description <sup>b</sup>                                     | 2h      |                    | 4h      |                    |
|------------------------------------|--------------------------------------------------------------|---------|--------------------|---------|--------------------|
|                                    |                                                              | Score   | Ratio <sup>c</sup> | Score   | Ratio <sup>c</sup> |
| Functional categories <sup>d</sup> |                                                              |         |                    |         |                    |
| METABOLISM                         |                                                              |         |                    |         |                    |
| Amino acid metabolism              |                                                              |         |                    |         |                    |
| PAAG_02975                         | 2,4-dihydroxyhept-2-ene-1,7-dioic acid aldolase 259 aa       | 1888,58 | 0,5712             |         |                    |
| PAAG_07563                         | asparagine synthetase 579 aa                                 | 1206,64 | Ctrl_2h            | 553,21  | Ctrl_4h            |
| PAAG_02603                         | aspartate aminotransferase 430 aa                            | 8696,34 | 0,6005             |         |                    |
| PAAG_00221                         | acetolactate synthase 674 aa                                 | 5089,81 | 0,8025             |         |                    |
| PAAG_02163                         | acetyl-/propionyl-coenzyme A carboxylase alpha chain 1243 aa | 933,69  | Ctrl_2h            | 522,64  | Ctrl_4h            |
| PAAG_07114                         | argininosuccinate synthase 414 aa                            | 5785,46 | 0,7634             |         |                    |
| PAAG_01563                         | aromatic L amino acid decarboxylase 546 aa                   | 1304,2  | Ctrl_2h            |         |                    |
| PAAG_05005                         | anthranilate synthase component 1 556 aa                     | 2234,65 | 0,5273             |         |                    |
| PAAG_08668                         | anthranilate synthase component 2 772 aa                     | 1416,12 | 0,5220             |         |                    |
| PAAG_03045                         | aminomethyltransferase 491 aa                                | 8640,31 | 0,5655             | 6447,76 | 0,6703             |
| PAAG_08405                         | cystathionine beta lyase 448 aa                              |         |                    | 415,33  | Ctrl_4h            |
| PAAG_04701                         | cystathionine gamma lyase 419 aa                             | 2216,06 | Ctrl_2h            |         |                    |
| PAAG_05851                         | cysteine desulfurase 501 aa                                  | 1622,22 | Ctrl_2h            | 1386,87 | Ctrl_4h            |
| PAAG_08649                         | cysteine dioxygenase 220 aa                                  |         |                    | 951,94  | Ctrl_4h            |
| PAAG_05860                         | glutamate cysteine ligase 283 aa                             | 819,8   | Ctrl_2h            |         |                    |
| PAAG_03506                         | glutamate decarboxylase 517 aa                               |         |                    | 472,41  | Ctrl_4h            |
| PAAG_02070                         | glutaminase A 904 aa                                         | 895,23  | Ctrl_2h            | 1125,27 | Ctrl_4h            |
| PAAG_07003                         | glutamine synthetase 359 aa                                  |         |                    | 632,28  | Ctrl_4h            |
| PAAG_04525                         | glutamine synthetase 487 aa                                  | 967,69  | Ctrl_2h            |         |                    |

|            |                                                           |         |         |         |         |
|------------|-----------------------------------------------------------|---------|---------|---------|---------|
| PAAG_05253 | delta-1-pyrroline-5-carboxylate dehydrogenase 573 aa      | 16182,9 | 0,6703  | 11454,1 | 0,7945  |
| PAAG_05776 | dihydroxy acid dehydratase 606 aa                         |         |         | 6103,76 | 0,6703  |
| PAAG_08163 | fumarylacetoacetase 429 aa                                |         |         | 6443,64 | 0,7261  |
| PAAG_08585 | thiosulfate sulfurtransferase 345 aa                      | 1136    | Ctrl_2h |         |         |
| PAAG_09095 | ATP phosphoribosyltransferase 328 aa                      | 778,5   | Ctrl_2h |         |         |
| PAAG_07659 | chorismate synthase 374 aa                                | 1086,82 | Ctrl_2h | 540,46  | Ctrl_4h |
| PAAG_01568 | glycine dehydrogenase 1184 aa                             | 4837,58 | 0,7483  | 3537,55 | 0,7945  |
| PAAG_05406 | histidine biosynthesis trifunctional protein 870 aa       | 5149,11 | 0,7483  |         |         |
|            | histone acetyltransferase type B catalytic subunit 555 aa |         |         |         |         |
| PAAG_00106 |                                                           | 565,48  | Ctrl_2h |         |         |
| PAAG_01929 | HNRNP arginine N methyltransferase 308 aa                 | 4303,5  | Ctrl_2h | 2303,04 | Ctrl_4h |
| PAAG_01991 | homoserine dehydrogenase 373 aa                           | 4785,64 | 0,6250  |         |         |
| PAAG_04348 | homoserine kinase 359 aa                                  | 925,73  | 0,6907  |         |         |
| PAAG_06215 | hydroxymethylglutaryl CoA lyase 357 aa                    | 997,93  | 0,6839  | 1858,6  | 0,7118  |
| PAAG_04102 | isovaleryl CoA dehydrogenase 431 aa                       | 9310,11 | 0,6313  |         |         |
| PAAG_08162 | maleylacetoacetate isomerase 158 aa                       | 976,1   | Ctrl_2h | 5213,06 | 0,3296  |
| PAAG_04103 | methylcrotonoyl CoA carboxylase beta chain 582 aa         |         |         | 6011,44 | 0,6703  |
| PAAG_08100 | O acetylhomoserine thiol lyase 440 aa                     |         |         | 28652,2 | 0,6250  |
| PAAG_06431 | ornithine aminotransferase 461 aa                         | 10648,1 | 0,7711  |         |         |
| PAAG_07317 | PENR2 protein 314 aa                                      | 784,59  | Ctrl_2h |         |         |
| PAAG_03237 | phospho 2 dehydro 3 deoxyheptonate aldolase 487 aa        |         |         | 490,52  | Ctrl_4h |
| PAAG_06096 | phospho 2 dehydro 3 deoxyheptonate aldolase 373 aa        | 595,13  | Ctrl_2h |         |         |
| PAAG_07243 | phosphoribosylformylglycinamide synthase 1362 aa          | 837,86  | Ctrl_2h | 721,79  | Ctrl_4h |
| PAAG_01302 | phosphorylase family protein 312 aa                       |         |         | 2321,98 | 0,8781  |
| PAAG_02693 | saccharopine dehydrogenase 451 aa                         | 2258,2  | 0,6250  |         |         |
| PAAG_02354 | serine 3 dehydrogenase 249 aa                             | 27845,5 | 0,4630  |         |         |
| PAAG_07412 | serine hydroxymethyltransferase 472 aa                    | 7760,84 | 0,6703  |         |         |

### Nucleotide/nucleoside/nucleobase metabolism

|            |                                                        |         |         |         |         |
|------------|--------------------------------------------------------|---------|---------|---------|---------|
| PAAG_07312 | CTP synthase 587 aa                                    | 790,76  | Ctrl_2h |         |         |
| PAAG_04974 | adenylosuccinate lyase 485 aa                          |         |         | 1806,65 | 0,7634  |
| PAAG_02170 | adenylosuccinate synthetase 422 aa                     |         |         | 3111,03 | 0,7408  |
| PAAG_07428 | allantoinase 553 aa                                    | 727,67  | Ctrl_2h |         |         |
| PAAG_08152 | 3 5 bisphosphate nucleotidase 353 aa                   |         |         | 398,06  | Ctrl_4h |
| PAAG_05611 | deoxyuridine 5 triphosphate nucleotidohydrolase 217 aa | 2163,92 | 0,5273  |         |         |
| PAAG_05392 | betaine aldehyde dehydrogenase 479 aa                  |         |         | 5498,65 | 0,6977  |
| PAAG_00731 | bifunctional purine biosynthesis protein ADE17 626 aa  | 18815   | 0,5655  |         |         |
| PAAG_07529 | orotidine 5 phosphate decarboxylase 162 aa             |         |         | 1489,66 | 0,7788  |
| PAAG_03530 | phosphoribosylamine glycine ligase 805 aa              | 619,65  | Ctrl_2h | 862,62  | Ctrl_4h |

### Nitrogen, sulfur and selenium metabolism

|            |                                      |         |         |        |         |
|------------|--------------------------------------|---------|---------|--------|---------|
| PAAG_00954 | urease 837 aa                        |         |         | 687,22 | Ctrl_4h |
| PAAG_06237 | urease accessory protein ureG 271 aa | 1079,66 | Ctrl_2h |        |         |
| PAAG_07811 | sulfite oxidase 449 aa               | 3031,88 | 0,7483  |        |         |

### Phosphate metabolism

|            |                                 |         |         |        |         |
|------------|---------------------------------|---------|---------|--------|---------|
| PAAG_00661 | 4 nitrophenylphosphatase 308 aa | 1009,37 | Ctrl_2h | 371,08 | Ctrl_4h |
|------------|---------------------------------|---------|---------|--------|---------|

### C-compound and carbohydrate metabolism

|            |                                                            |         |         |        |         |
|------------|------------------------------------------------------------|---------|---------|--------|---------|
| PAAG_03978 | 3 hydroxyisobutyrate dehydrogenase 345 aa                  | 6701,68 | 0,6250  |        |         |
| PAAG_05780 | 2 5 diketo D gluconic acid reductase A 280 aa              | 1291,25 | 0,6440  |        |         |
| PAAG_04233 | 2 nitropropane dioxygenase 331 aa                          | 602,78  | Ctrl_2h |        |         |
| PAAG_04526 | 3 beta hydroxysteroid dehydrogenase 276 aa                 |         |         | 955,22 | Ctrl_4h |
| PAAG_05761 | 4 carboxymuconolactone decarboxylase family protein 186 aa | 765,12  | Ctrl_2h |        |         |
| PAAG_00685 | alpha mannosidase 1098 aa                                  | 3444,93 | 0,7558  |        |         |

|                                             |                                                       |         |         |         |         |
|---------------------------------------------|-------------------------------------------------------|---------|---------|---------|---------|
| PAAG_07804                                  | D lactate dehydrogenase 525 aa                        | 1058,05 | 0,7483  |         |         |
| PAAG_01885                                  | galactokinase 529 aa                                  | 849,84  | Ctrl_2h |         |         |
| PAAG_05690                                  | esterase D 287 aa                                     |         |         | 1740,25 | 0,8106  |
| PAAG_07276                                  | glycogen synthase 711 aa                              | 866,96  | Ctrl_2h | 552,26  | Ctrl_4h |
| PAAG_06473                                  | mannitol 1 phosphate 5 dehydrogenase 389 aa           | 6950,11 | 0,7558  | 10457,5 | 0,7711  |
| PAAG_04602                                  | mannosyl oligosaccharide glucosidase 850 aa           | 733,45  | 0,6376  |         |         |
| PAAG_08351                                  | isocitrate dehydrogenase [NADP], mitochondrial 492 aa |         |         | 1413,59 | Ctrl_4h |
| PAAG_04290                                  | neutral alpha glucosidase AB 970 aa                   |         |         | 603,25  | Ctrl_4h |
| PAAG_02115                                  | ribose phosphate pyrophosphokinase 455 aa             | 1080,21 | Ctrl_2h |         |         |
| Lipid, fatty acid and isoprenoid metabolism |                                                       |         |         |         |         |
| Synthesis                                   |                                                       |         |         |         |         |
| PAAG_01525                                  | fatty acid synthase subunit alpha reductase 1883 aa   | 773,66  | Ctrl_2h |         |         |
| PAAG_04963                                  | oleate induced peroxisomal protein 130 aa             | 4624,27 | Ctrl_2h |         |         |
| PAAG_02150                                  | acyl CoA thioesterase II 356 aa                       | 581,45  | Ctrl_2h | 403,03  | Ctrl_4h |
| PAAG_01870                                  | 3-oxoacyl-[acyl-carrier protein] reductase 295 aa     | 1087,92 | Ctrl_2h | 539,53  | Ctrl_4h |
| Oxidation                                   |                                                       |         |         |         |         |
| PAAG_03116                                  | acyl coenzyme A oxidase 683 aa                        | 699,66  | Ctrl_2h |         |         |
| PAAG_06224                                  | carnitine O acetyltransferase 611 aa                  |         |         | 2634,4  | 0,6771  |
| PAAG_06175                                  | peroxisomal matrix protein 167 aa                     |         |         | 23537,1 | 0,8270  |
| PAAG_07746                                  | 3 ketoacyl CoA thiolase 422 aa                        | 1286,87 | Ctrl_2h |         |         |
| PAAG_03689                                  | 3 ketoacyl CoA thiolase B 420 aa                      | 11777,1 | 0,5655  | 9649,39 | 0,6188  |
| PAAG_05454                                  | acyl CoA dehydrogenase 440 aa                         | 11957,5 | 0,7118  | 12158,1 | 0,6839  |
| PAAG_07786                                  | acetyl CoA acetyltransferase 400 aa                   | 9270,93 | 0,7711  |         |         |
| PAAG_03447                                  | acetyl CoA acetyltransferase 439 aa                   | 4561,71 | 0,7047  |         |         |
| PAAG_00435                                  | R benzylsuccinyl CoA dehydrogenase 445 aa             |         |         | 1050,16 | Ctrl_4h |
| Synthesis or oxidation                      |                                                       |         |         |         |         |

|                                                                 |                                                                 |         |         |         |         |
|-----------------------------------------------------------------|-----------------------------------------------------------------|---------|---------|---------|---------|
| PAAG_06329                                                      | 3 hydroxybutyryl CoA dehydrogenase 322 aa                       | 10656,3 | 0,7788  |         |         |
| PAAG_01833                                                      | 2 succinylbenzoate CoA ligase 583 aa                            | 1419,62 | Ctrl_2h |         |         |
| PAAG_07631                                                      | short chain dehydrogenase reductase family protein 256 aa       | 1347,16 | Ctrl_2h |         |         |
| PAAG_05093                                                      | succinyl CoA 3 ketoacid coenzyme A transferase subunit B 515 aa | 10251   | 0,6005  | 7115,22 | 0,8106  |
| PAAG_03216                                                      | mitochondrial peroxiredoxin PRX1 223 aa                         | 7533,36 | 0,7711  | 11639,6 | 0,5379  |
| <b>Metabolism of vitamins, cofactors, and prosthetic groups</b> |                                                                 |         |         |         |         |
| PAAG_04294                                                      | methylenetetrahydrofolate reductase 714 aa                      | 1726,81 | Ctrl_2h | 730,66  | Ctrl_4h |
| PAAG_07036                                                      | methylmalonate semialdehyde dehydrogenase 586 aa                | 14768,5 | 0,5379  |         |         |
| PAAG_00293                                                      | quinone oxidoreductase 203 aa                                   |         |         | 857     | Ctrl_4h |
| PAAG_02382                                                      | quinone oxidoreductase 392 aa                                   | 5822,92 | 0,5945  | 4744,35 | 0,7788  |
| PAAG_01934                                                      | riboflavin synthase alpha chain 239 aa                          |         |         | 3779,56 | Ctrl_4h |
| PAAG_08349                                                      | C 1 tetrahydrofolate synthase 940 aa                            | 906,97  | Ctrl_2h |         |         |
| <b>Secondary metabolism</b>                                     |                                                                 |         |         |         |         |
| PAAG_04888                                                      | 4 coumarate CoA ligase 583 aa                                   | 1354,96 | Ctrl_2h |         |         |
| PAAG_01324                                                      | folic acid synthesis protein 601 aa                             |         |         | 3430,48 | 0,6313  |
| PAAG_07591                                                      | diphosphomevalonate decarboxylase 406 aa                        | 1029,09 | Ctrl_2h |         |         |
| PAAG_03960                                                      | isopentenyl diphosphate Delta isomerase 272 aa                  | 1187,53 | Ctrl_2h | 1642,61 | Ctrl_4h |
| <b>ENERGY</b>                                                   |                                                                 |         |         |         |         |
| <b>Glycolysis and gluconeogenesis</b>                           |                                                                 |         |         |         |         |
| PAAG_02011                                                      | phosphoglucosmutase 763 aa                                      | 2299,35 | 0,7945  | 2308,03 | 0,6839  |
| PAAG_01015                                                      | hexokinase 428 aa                                               |         |         | 1743,78 | 0,8106  |
| PAAG_03643                                                      | 6 phosphofructo 2 kinase 535 aa                                 | 745,82  | Ctrl_2h |         |         |
| PAAG_08468                                                      | glyceraldehyde 3 phosphate dehydrogenase 338 aa                 | 52210,4 | 1,7333  | 56727,1 | 0,7788  |
| PAAG_01995                                                      | fructose bisphosphate aldolase 361 aa                           | 19801,4 | 0,7788  |         |         |
| PAAG_02585                                                      | triosephosphate isomerase 250 aa                                | 17069,2 | 0,8187  | 22836,5 | 0,8025  |

|                                                                |                                                     |         |         |         |         |
|----------------------------------------------------------------|-----------------------------------------------------|---------|---------|---------|---------|
| PAAG_08203                                                     | phosphoenolpyruvate carboxykinase 578 aa            | 5972,56 | 0,7408  | 9191,5  | 0,6440  |
| PAAG_06380                                                     | pyruvate kinase 535 aa                              | 30539,4 | 0,5169  | 22075,3 | 0,8187  |
| Tricarboxylic-acid pathway                                     |                                                     |         |         |         |         |
| PAAG_07843                                                     | aconitate hydratase 801 aa                          | 585,32  | Ctrl_2h |         |         |
| PAAG_04559                                                     | 2 methylcitrate dehydratase 562 aa                  |         |         | 59883,6 | 0,8025  |
| PAAG_05328                                                     | 3 isopropylmalate dehydrogenase A 363 aa            | 606,42  | Ctrl_2h | 555,77  | Ctrl_4h |
| PAAG_05048                                                     | 3 isopropylmalate dehydratase large subunit 786 aa  | 17412,9 | 0,6126  | 16139,1 | 0,6376  |
| PAAG_00726                                                     | pyruvate carboxylase 1197 aa                        | 2817,76 | 0,7945  |         |         |
| PAAG_02732                                                     | 2 oxoglutarate dehydrogenase E1 1073 aa             | 2180,27 | 0,6907  |         |         |
| PAAG_01725                                                     | succinate dehydrogenase flavoprotein subunit 672 aa | 2090,06 | 0,7711  | 6260,18 | 0,6313  |
| PAAG_06103                                                     | succinate dehydrogenase iron sulfur subunit 283 aa  |         |         | 1936,28 | Ctrl_4h |
| PAAG_00588                                                     | fumarate hydratase 364 aa                           | 4810,51 | 0,7047  |         |         |
| PAAG_07729                                                     | isocitrate dehydrogenase subunit 2 342 aa           | 1188,02 | Ctrl_2h |         |         |
| Glyoxylate cycle                                               |                                                     |         |         |         |         |
| PAAG_06951                                                     | isocitrate lyase 538 aa                             |         |         | 6624,44 | 0,8106  |
| PAAG_04549                                                     | mitochondrial 2 methylisocitrate lyase 602 aa       | 8962,62 | 0,7483  |         |         |
| Pentose-phosphate pathway                                      |                                                     |         |         |         |         |
| PAAG_05940                                                     | deoxyribose phosphate aldolase 280 aa               |         |         | 666,92  | Ctrl_4h |
| PAAG_04444                                                     | transketolase 686 aa                                | 8021,92 | 0,8353  |         |         |
| PAAG_01481                                                     | FGGY family carbohydrate kinase 617 aa              | 674,31  | Ctrl_2h |         |         |
| Electron transport and membrane-associated energy conservation |                                                     |         |         |         |         |
| PAAG_06155                                                     | vacuolar ATP synthase subunit E 240 aa              |         |         | 2523,86 | Ctrl_4h |
| PAAG_03668                                                     | vacuolar ATP synthase subunit F 125 aa              |         |         | 1009,06 | Ctrl_4h |
| PAAG_05605                                                     | ATP synthase delta chain 166 aa                     | 4776,94 | Inf_2h  | 9150,56 | 0,6637  |
| PAAG_05576                                                     | ATP synthase gamma chain 298 aa                     | 16473,7 | 0,6313  | 17824,8 | 0,6637  |
| PAAG_06206                                                     | ATP synthase subunit 5 231 aa                       | 788,81  | Ctrl_2h |         |         |

|                                      |                                                            |         |         |         |         |
|--------------------------------------|------------------------------------------------------------|---------|---------|---------|---------|
| PAAG_08037                           | ATP synthase subunit beta 514 aa                           |         |         | 59337,6 | 0,6505  |
| PAAG_06093                           | cytochrome c1 323 aa                                       | 946,96  | Ctrl_2h |         |         |
| PAAG_07672                           | ubiquinol-cytochrome c reductase subunit 7 122 aa          | 7656,62 | Ctrl_2h | 7804,24 | Ctrl_4h |
| PAAG_06796                           | cytochrome c oxidase subunit 4, mitochondrial 197 aa       | 620,05  | Ctrl_2h |         |         |
| <b>Fermentation</b>                  |                                                            |         |         |         |         |
| PAAG_00403                           | alcohol dehydrogenase 355 aa                               | 4878,41 | 0,7945  |         |         |
| PAAG_03910                           | aldehyde dehydrogenase 472 aa                              | 1304,33 | Ctrl_2h |         |         |
| <b>Respiration</b>                   |                                                            |         |         |         |         |
| PAAG_00173                           | electron transfer flavoprotein subunit alpha 349 aa        | 6869,75 | 0,5886  |         |         |
| PAAG_04931                           | electron transfer flavoprotein subunit beta 263 aa         | 5092    | 0,7788  | 8865,75 | 0,7118  |
| <b>CELL CYCLE AND DNA PROCESSING</b> |                                                            |         |         |         |         |
| PAAG_08471                           | histone H2A Z 139 aa                                       | 2068,3  | Ctrl_2h |         |         |
| PAAG_02230                           | cell division control protein 193 aa                       |         |         | 1476,71 | Ctrl_4h |
| PAAG_08074                           | clock controlled gene 9 protein 711 aa                     | 961,82  | Ctrl_2h |         |         |
| PAAG_06511                           | mitochondrial genome maintenance protein mgm101 295 aa     | 2533,01 | Ctrl_2h |         |         |
| PAAG_00923                           | proliferating cell nuclear antigen 282 aa                  |         |         | 22991,9 | 0,8270  |
| <b>TRANSCRIPTION</b>                 |                                                            |         |         |         |         |
| PAAG_03652                           | cap binding protein 832 aa                                 | 1193,21 | Ctrl_2h |         |         |
| PAAG_03941                           | G4 quadruplex nucleic acid binding protein 442 aa          | 842,83  | Ctrl_2h |         |         |
| PAAG_03783                           | GAF domain nucleotide binding protein 213 aa               | 1660,08 | Ctrl_2h |         |         |
| PAAG_04496                           | nascent polypeptide associated complex subunit beta 168 aa |         |         | 618,01  | Ctrl_4h |
| PAAG_01710                           | polymerase II polypeptide D 153 aa                         | 1128,23 | Ctrl_2h |         |         |
| PAAG_03710                           | mRNA splicing protein SME1 94 aa                           | 1190,8  | Ctrl_2h |         |         |
| PAAG_06565                           | pre mRNA splicing factor ini1 111 aa                       |         |         | 1629,41 | Ctrl_4h |
| PAAG_04637                           | pre mRNA splicing factor rse1 1210 aa                      | 668,62  | Ctrl_2h |         |         |

|            |                                                |         |         |         |         |
|------------|------------------------------------------------|---------|---------|---------|---------|
| PAAG_01736 | ran GTPase activating protein 498 aa           | 798,38  | Ctrl_2h |         |         |
| PAAG_02466 | ran specific GTPase activating protein 478 aa  | 22261,5 | 0,5220  | 30250,1 | 0,7788  |
| PAAG_01630 | small nuclear ribonucleoprotein LSM2 99 aa     | 3522,85 | 0,6505  |         |         |
| PAAG_02537 | small nuclear ribonucleoprotein Sm D2 115 aa   | 2601,98 | Ctrl_2h | 986,06  | 0,2019  |
| PAAG_03030 | splicing factor U2AF associated protein 399 aa | 692,93  | Ctrl_2h |         |         |
| PAAG_02437 | U2 small nuclear ribonucleoprotein B 254 aa    | 1660,54 | Ctrl_2h |         |         |
| PAAG_00847 | RNA methylation protein TRM1125 aa             |         |         | 553,61  | Ctrl_4h |
| PAAG_01042 | cleavage stimulation factor subunit 2 306 aa   |         |         | 521,1   | Ctrl_4h |

### PROTEIN SYNTHESIS

|            |                                    |         |         |         |         |
|------------|------------------------------------|---------|---------|---------|---------|
| PAAG_06367 | 30S ribosomal protein S17P 162 aa  | 5693,42 | 0,4771  |         |         |
| PAAG_02111 | 40S ribosomal protein S0 296 aa    | 16049,9 | 0,7047  | 13499,5 | 0,7334  |
| PAAG_05017 | 40S ribosomal protein S10 A 166 aa | 3359,26 | 0,8353  |         |         |
| PAAG_05704 | 40S ribosomal protein S13 1 152 aa | 11821,5 | 0,7334  | 8064,04 | 0,7408  |
| PAAG_01433 | 40S ribosomal protein S14 152 aa   | 6079,82 | 0,6839  |         |         |
| PAAG_01435 | 40S ribosomal protein S16 144 aa   |         |         | 5681,03 | 0,7408  |
| PAAG_09043 | 40S ribosomal protein S2 261 aa    | 8377,41 | 0,4771  | 9507    | 0,6771  |
| PAAG_05337 | 40S ribosomal protein S22 131 aa   | 7360,93 | 0,7945  | 15699,5 | 0,4916  |
| PAAG_00385 | 40S ribosomal protein S23 146 aa   |         |         | 803,7   | Ctrl_4h |
| PAAG_06882 | 40S ribosomal protein S24 135 aa   | 8118,43 | Ctrl_2h | 13835   | Ctrl_4h |
| PAAG_07847 | 40S ribosomal protein S26 122 aa   | 16543,8 | 0,6005  | 18525,8 | 0,7711  |
| PAAG_03816 | 40S ribosomal protein S4 263 aa    | 6643,12 | 0,5886  |         |         |
| PAAG_07182 | 40S ribosomal protein S7 202 aa    |         |         | 32138,4 | 0,6005  |
| PAAG_00264 | 40S ribosomal protein S8 B 203 aa  | 12069,5 | 0,5117  |         |         |
| PAAG_03828 | 40S ribosomal protein S9 192 aa    | 4421,29 | 0,8187  |         |         |
| PAAG_02553 | 54S ribosomal protein YmL6 347 aa  | 2764,95 | Ctrl_2h | 777,5   | Ctrl_4h |
| PAAG_01052 | 60S ribosomal protein L10 B 224 aa |         |         | 25149,9 | 0,7408  |



|            |                                                  |         |         |         |         |
|------------|--------------------------------------------------|---------|---------|---------|---------|
| PAAG_06320 | 60S ribosomal protein L13 218 aa                 | 4642,12 | 0,2276  |         |         |
| PAAG_00969 | 60S ribosomal protein L15 204 aa                 | 4015,15 | Ctrl_2h | 7902,53 | 0,5769  |
| PAAG_07955 | 60S ribosomal protein L18 190 aa                 | 6431,56 | 0,4274  | 10181,9 | 0,4630  |
| PAAG_08497 | 60S ribosomal protein L19 192 aa                 | 10343,8 | Ctrl_2h |         |         |
| PAAG_00430 | 60S ribosomal protein L2 255 aa                  | 14064,5 | 0,2808  | 19318,6 | 0,5599  |
| PAAG_00952 | 60S ribosomal protein L20 175 aa                 | 9764,44 | 0,5016  |         |         |
| PAAG_03827 | 60S ribosomal protein L21 A 161 aa               | 18895,7 | 0,4232  | 19542,2 | 0,7634  |
| PAAG_07385 | 60S ribosomal protein L23a 154 aa                | 9688,31 | 0,2698  | 10275,4 | 0,4966  |
| PAAG_05233 | 60S ribosomal protein L26 135 aa                 | 2696,66 | Ctrl_2h | 5792,09 | Ctrl_4h |
| PAAG_01939 | 60S ribosomal protein L27 A 136 aa               | 2327,65 | Ctrl_2h | 6572,29 | Ctrl_4h |
| PAAG_00088 | 60S ribosomal protein L3 393 aa                  | 4382,07 | 0,7047  |         |         |
| PAAG_06792 | 60S ribosomal protein L34 B 121 aa               | 3747,94 | Ctrl_2h | 3029,95 | 0,4538  |
| PAAG_08888 | 60S ribosomal protein L4 A 373 aa                |         |         | 15630,9 | 0,3135  |
| PAAG_06569 | 60S ribosomal protein L43 93 aa                  |         |         | 9897,64 | Ctrl_4h |
| PAAG_06487 | 60S ribosomal protein L7 C 249 aa                | 7181,62 | 0,6907  | 7797,62 | 0,6637  |
| PAAG_04998 | 60S ribosomal protein L8 B 262 aa                |         |         | 13287,6 | 0,5599  |
| PAAG_00347 | 60S ribosomal protein L9 B 193 aa                | 8087,53 | 0,7334  | 11490,7 | 0,8106  |
| PAAG_00205 | 60S ribosomal protein L24 145 aa                 |         |         | 7876,76 | Ctrl_4h |
| PAAG_01001 | 40S ribosomal protein S29 81 aa                  | 1071,41 | Ctrl_2h |         |         |
| PAAG_09096 | 40S ribosomal protein S28 69 aa                  | 25278   | 0,2393  | 27799,5 | 0,4538  |
| PAAG_00724 | ribosomal protein 11 large subunit 176 aa        |         |         | 11840   | 0,7118  |
| PAAG_06743 | ribosomal protein L23e 141 aa                    | 6577,25 | Ctrl_2h | 4262,78 | Ctrl_4h |
| PAAG_02889 | ribosomal protein L35 126 aa                     | 1027,6  | Inf_2h  | 1900,46 | Ctrl_4h |
| PAAG_00765 | 60S ribosomal protein L36 176 aa                 | 16777,2 | 0,4190  | 11635,9 | 0,7408  |
| PAAG_06970 | mitochondrial 37S ribosomal protein RSM24 376 aa | 828,99  | Ctrl_2h |         |         |
| PAAG_01731 | mitochondrial 54S ribosomal protein YmL37 219 aa | 785,65  | Ctrl_2h |         |         |

|            |                                                      |         |         |         |         |
|------------|------------------------------------------------------|---------|---------|---------|---------|
| PAAG_01050 | cytosolic large ribosomal subunit protein L30 109 aa | 7281,94 | 0,6005  | 13153,2 | 0,6250  |
| PAAG_03167 | elongation factor G 1 798 aa                         | 586,09  | Ctrl_2h |         |         |
| PAAG_01777 | alanyl tRNA synthetase 963 aa                        | 6313,91 | 0,6065  |         |         |
| PAAG_07349 | glycyl tRNA synthetase 656 aa                        | 1396,12 | 0,7261  |         |         |
| PAAG_03572 | glutaminyl tRNA synthetase 718 aa                    |         |         | 2166,75 | 0,7408  |
| PAAG_07105 | isoleucyl tRNA synthetase 1080 aa                    | 1101,87 | Ctrl_2h |         |         |
| PAAG_04193 | cysteinyl tRNA synthetase 821 aa                     | 752,73  | Ctrl_2h |         |         |
| PAAG_02865 | translation initiation factor RLI1 624 aa            | 916,53  | Ctrl_2h |         |         |
| PAAG_01786 | phenylalanyl tRNA synthetase beta chain 600 aa       | 1778,33 | Ctrl_2h |         |         |
| PAAG_08702 | seryl tRNA synthetase 489 aa                         | 1412,01 | 0,7118  | 4297,79 | 0,2491  |
| PAAG_01711 | tRNA methyltransferase Trm5 480 aa                   | 1907,35 | Ctrl_2h | 891,79  | Ctrl_4h |

## PROTEIN FATE

|            |                                                 |         |         |         |         |
|------------|-------------------------------------------------|---------|---------|---------|---------|
| PAAG_00768 | peptidase family protein 443 aa                 |         |         | 807     | Ctrl_4h |
| PAAG_05788 | peptidyl prolyl cis trans isomerase A2 251 aa   | 7680,58 | 0,5945  | 7493,82 | 0,6637  |
| PAAG_00739 | peptidyl prolyl cis trans isomerase B 211 aa    |         |         | 9887,13 | 0,4148  |
| PAAG_06168 | peptidyl prolyl cis trans isomerase cypE 142 aa |         |         | 5713,62 | 0,7634  |
| PAAG_03334 | peptidyl prolyl cis trans isomerase D 374 aa    |         |         | 34318,9 | 0,8270  |
| PAAG_01778 | peptidyl prolyl cis trans isomerase H 181 aa    | 1819,66 | Ctrl_2h |         |         |
| PAAG_09004 | puromycin sensitive aminopeptidase 899 aa       | 3918,75 | 0,6126  | 3272,5  | 0,7866  |
| PAAG_07500 | xaa Pro aminopeptidase 469 aa                   | 1043,43 | Ctrl_2h |         |         |
| PAAG_07319 | xaa Pro aminopeptidase 699 aa                   | 2462,73 | Ctrl_2h | 1265,21 | Ctrl_4h |
| PAAG_07467 | dipeptidyl peptidase 773 aa                     | 2361,19 | 0,8187  | 1231,73 | 0,8270  |
| PAAG_00986 | disulfide isomerase Pdi1 539 aa                 | 27315,5 | 0,7483  |         |         |
| PAAG_05643 | NAD(P)H:quinone oxidoreductase, type IV 220 aa  | 20623,6 | 0,5886  |         |         |
| PAAG_05107 | AAA ATPase 921 aa                               | 579,59  | Ctrl_2h |         |         |
| PAAG_00238 | ubiquitin 219 aa                                | 7897,75 | Ctrl_2h |         |         |

|            |                                               |         |         |         |         |
|------------|-----------------------------------------------|---------|---------|---------|---------|
| PAAG_04327 | ubiquitin carboxyl terminal hydrolase 1129 aa | 682,86  | Ctrl_2h |         |         |
| PAAG_00295 | ubiquitin carboxyl terminal hydrolase 784 aa  | 585,61  | Ctrl_2h | 798,37  | Ctrl_4h |
| PAAG_00367 | ubiquitin-binding protein CUE5 434 aa         | 1645,58 | Ctrl_2h | 538,82  | Ctrl_4h |
| PAAG_07890 | vacuolar sorting protein snf7 223 aa          | 3560,46 | Ctrl_2h |         |         |
| PAAG_07037 | calnexin 568 aa                               | 2454,18 | 0,7483  |         |         |
| PAAG_03533 | Hsp70 nucleotide exchange factor fes1 226 aa  |         |         | 1203,08 | Ctrl_4h |
| PAAG_07849 | metacaspase 1 384 aa                          |         |         | 367,55  | Ctrl_4h |
| PAAG_01650 | monothiol glutaredoxin 5 277 aa               | 539,84  | Ctrl_2h |         |         |

#### CELLULAR TRANSPORT, TRANSPORT FACILITIES AND TRANSPORT ROUTES

|            |                                                             |         |         |         |         |
|------------|-------------------------------------------------------------|---------|---------|---------|---------|
| PAAG_08954 | GTP cyclohydrolase 501 aa                                   | 1574,33 | Ctrl_2h |         |         |
|            | GTP dependent nucleic acid binding protein engD 394 aa      | 1057,48 | Ctrl_2h |         |         |
| PAAG_02820 |                                                             |         |         |         |         |
| PAAG_07111 | cyclin dependent kinase B1-1 407 aa                         | 647,39  | Ctrl_2h |         |         |
| PAAG_03953 | WD repeat containing protein 425 aa                         | 639,51  | Ctrl_2h |         |         |
| PAAG_01947 | ATPase GET3 342 aa                                          | 684,47  | Ctrl_2h |         |         |
| PAAG_02019 | F-type H <sup>+</sup> -transporting ATPase subunit H 219 aa |         |         | 4490,94 | 0,7261  |
| PAAG_06878 | V-type ATPase, G subunit 140 aa                             |         |         | 984,64  | Ctrl_4h |
| PAAG_02467 | ran-specific GTPase-activating protein 1 478 aa             | 2894,47 | Ctrl_2h |         |         |
| PAAG_03445 | kinesin heavy chain 1023 aa                                 |         |         | 400,38  | Ctrl_4h |
| PAAG_07185 | actin like protein 2/3 complex, subunit 5 193 aa            |         |         | 612,17  | Ctrl_4h |
| PAAG_03717 | myosin regulatory light chain cdc4 140 aa                   | 3122,03 | Ctrl_2h |         |         |
| PAAG_05960 | NIPSNAP family protein 410 aa                               | 9239,23 | 0,8106  | 6733,49 | 0,6907  |
| PAAG_00326 | iron/copper transporter Atx1 81 aa                          | 18073,8 | Ctrl_2h |         |         |

#### CELLULAR COMMUNICATION/SIGNAL TRANSDUCTION MECHANISM

|            |                                                 |         |         |  |  |
|------------|-------------------------------------------------|---------|---------|--|--|
| PAAG_02377 | rho GDP dissociation inhibitor 186 aa           | 6597,71 | 0,7189  |  |  |
| PAAG_00783 | serine threonine protein phosphatase PP1 325 aa | 695,92  | Ctrl_2h |  |  |

#### BIOGENESIS OF CELLULAR COMPONENTS

|            |                                                  |         |         |         |         |
|------------|--------------------------------------------------|---------|---------|---------|---------|
| PAAG_00004 | actin binding protein 582 aa                     | 3722,17 | Ctrl_2h | 1370,04 | Ctrl_4h |
| PAAG_00997 | actin interacting protein 614 aa                 |         |         | 839,36  | Ctrl_4h |
| PAAG_06192 | ARP2 3 complex 20 kDa subunit 170 aa             | 3219,42 | 0,4317  |         |         |
| PAAG_05663 | ARP2 3 complex 34 kDa subunit 319 aa             | 1268,4  | Ctrl_2h |         |         |
| PAAG_00622 | mitochondria fission 1 protein 154 aa            | 661,33  | Ctrl_2h |         |         |
| PAAG_07150 | UDP galactopyranose mutase 521 aa                | 2925,09 | 0,6839  |         |         |
| PAAG_06885 | UDP N acetylglucosamine pyrophosphorylase 748 aa | 2630,13 | 0,7047  |         |         |

#### PROTEIN WITH BINDING FUNCTION OR COFACTOR REQUIREMENT

|            |                                                         |         |         |         |         |
|------------|---------------------------------------------------------|---------|---------|---------|---------|
| PAAG_00501 | ADP ribose pyrophosphatase 216 aa                       |         |         | 1826,97 | Ctrl_4h |
| PAAG_01452 | ADP ribosylation factor 171 aa                          | 628,13  | Ctrl_2h |         |         |
| PAAG_07702 | ADP ribosylation factor 184 aa                          |         |         | 4294,32 | 0,5712  |
| PAAG_06574 | curved DNA binding protein 42 kDa protein 419 aa        | 1377,89 | Ctrl_2h |         |         |
| PAAG_06886 | zinc finger protein GIS2 223 aa                         |         |         | 2325,13 | Ctrl_4h |
| PAAG_03551 | calcineurin subunit B 190 aa                            | 2654,7  | Ctrl_2h |         |         |
| PAAG_07887 | cAMP dependent protein kinase regulatory subunit 445 aa | 1204,54 | Ctrl_2h |         |         |
| PAAG_03640 | CCR4 Not complex subunit Caf16 273 aa                   | 1252,29 | Ctrl_2h |         |         |
| PAAG_09122 | FK506 binding protein 141 aa                            |         |         | 4799,3  | Ctrl_4h |
| PAAG_01424 | iron binding protein erpA 113 aa                        | 715,5   | Ctrl_2h |         |         |
| PAAG_02352 | molybdopterin binding domain containing protein 332 aa  | 857,65  | Ctrl_2h | 625,53  | Ctrl_4h |
| PAAG_08703 | rheb small monomeric GTPase RhbA 264 aa                 | 1260,16 | Ctrl_2h |         |         |

#### CELL RESCUE, DEFENSE AND VIRULENCE

##### Stress response

|            |                                                |         |        |         |        |
|------------|------------------------------------------------|---------|--------|---------|--------|
| PAAG_07750 | heat shock protein Hsp88 728 aa                | 25035,6 | 0,7189 |         |        |
| PAAG_05142 | 10 kDa heat shock protein mitochondrial 103 aa | 38028,7 | 0,7711 | 80806,1 | 0,5769 |
| PAAG_08003 | hsp70 like protein 655 aa                      |         |        | 99072,4 | 0,7788 |

|                       |                                                      |         |         |         |         |
|-----------------------|------------------------------------------------------|---------|---------|---------|---------|
| PAAG_03292            | cytochrome c peroxidase 375 aa                       | 14778,7 | 0,7047  |         |         |
| PAAG_06947            | gamma glutamyltranspeptidase 594 aa                  | 1230,24 | Ctrl_4h |         |         |
| <b>Detoxification</b> |                                                      |         |         |         |         |
| PAAG_07020            | thioredoxin reductase 359 aa                         | 1323,23 | Ctrl_4h |         |         |
| <b>MISCELLANEOUS</b>  |                                                      |         |         |         |         |
| PAAG_02802            | ankyrin repeat containing protein 215 aa             | 780,58  | Ctrl_2h |         |         |
|                       | SAM dependent methyltransferase UbiE/COQ5            |         |         |         |         |
| PAAG_01704            | family protein 301 aa                                | 662,7   | Ctrl_4h |         |         |
| PAAG_08992            | type 2A phosphatase activator tip41 243 aa           | 877,44  | Ctrl_2h |         |         |
| <b>UNCLASSIFIED</b>   |                                                      |         |         |         |         |
| PAAG_01935            | formyl coenzyme A transferase 450 aa                 | 1666,83 | 0,6703  |         |         |
| PAAG_06083            | dienelactone hydrolase family protein 246 aa         | 5374,49 | 0,6703  |         |         |
| PAAG_02665            | DlpA domain-containing protein 239 aa                | 700,98  | Inf_2h  | 551,67  | Ctrl_4h |
| PAAG_06515            | DUF833 domain containing protein 321 aa              | 8513,61 | Ctrl_2h | 2348,46 | Ctrl_4h |
| PAAG_02567            | EF hand superfamily Ca2 modulated protein 190 aa     | 1014,82 | Ctrl_2h |         |         |
| PAAG_08179            | RING superfamily domain-containing protein 231 aa    | 1087,27 | Ctrl_2h | 1015,05 | Ctrl_4h |
| PAAG_01539            | SNF7 family protein Fti1/Did2, variant 240 aa        | 1727,3  | Ctrl_2h | 484,51  | Ctrl_4h |
|                       | secondary thiamine-phosphate synthase enzyme 219 aa  |         |         |         |         |
| PAAG_07792            |                                                      | 8547,98 | Ctrl_2h |         |         |
| PAAG_01045            | NIF3-like protein 110 aa                             |         |         | 467,04  | Ctrl_4h |
| PAAG_03741            | hydrolase-HD superfamily protein 152 aa              |         |         | 4268,04 | Ctrl_4h |
| PAAG_05864            | COPII-coated vesicle protein 401 aa                  | 690,66  | Ctrl_2h |         |         |
|                       | Bot1p superfamily domain-containing protein, partial |         |         |         |         |
| PAAG_08693            | 412 aa                                               | 1882,75 | Ctrl_2h |         |         |
| PAAG_01572            | zuotin 445 aa                                        |         |         | 2687,7  | 0,7634  |
| PAAG_02434            | hypothetical protein 132 aa                          |         |         | 1321,19 | Ctrl_4h |
| PAAG_06923            | hypothetical protein 164 aa                          | 546,88  | Ctrl_2h |         |         |

|            |                                       |         |         |         |         |
|------------|---------------------------------------|---------|---------|---------|---------|
| PAAG_05550 | hypothetical protein 173 aa           |         |         | 1393,39 | Ctrl_4h |
| PAAG_03239 | hypothetical protein 177 aa           |         |         | 2155,76 | Ctrl_4h |
| PAAG_05348 | hypothetical protein 231 aa           | 1636,04 | Ctrl_2h | 2312,75 | Ctrl_4h |
| PAAG_01776 | hypothetical protein 241 aa           |         |         | 674,4   | Ctrl_4h |
| PAAG_05822 | hypothetical protein 256 aa           |         |         | 438,42  | Ctrl_4h |
| PAAG_05224 | hypothetical protein 282 aa           | 2388,38 | 0,6440  |         |         |
| PAAG_01863 | hypothetical protein 69 aa            | 2106,85 | Ctrl_2h | 2905,31 | Ctrl_4h |
| PAAG_02828 | hypothetical protein 79 aa            | 12074,8 | 0,4148  |         |         |
| PAAG_04647 | conserved hypothetical protein 115 aa | 573,85  | Ctrl_2h |         |         |
| PAAG_03925 | conserved hypothetical protein 121 aa | 1346,8  | Ctrl_2h |         |         |
| PAAG_07543 | conserved hypothetical protein 121 aa |         |         | 1477,94 | Ctrl_4h |
| PAAG_07411 | conserved hypothetical protein 196 aa | 816,97  | Ctrl_2h |         |         |
| PAAG_07772 | conserved hypothetical protein 211 aa |         |         | 7540,36 | 0,6126  |
| PAAG_01327 | conserved hypothetical protein 239 aa |         |         | 619,6   | Ctrl_4h |
| PAAG_00579 | conserved hypothetical protein 298 aa | 754,48  | Ctrl_2h |         |         |
| PAAG_00904 | conserved hypothetical protein 347 aa |         |         | 400,54  | Ctrl_4h |
| PAAG_08413 | conserved hypothetical protein 348 aa | 677,99  | Ctrl_2h |         |         |
| PAAG_00335 | conserved hypothetical protein 370 aa | 727,96  | Ctrl_2h | 1105,78 | Ctrl_4h |
| PAAG_01717 | conserved hypothetical protein 414 aa | 3596,53 | Ctrl_2h |         |         |
| PAAG_02068 | conserved hypothetical protein 450 aa |         |         | 1746,28 | Ctrl_4h |
| PAAG_05547 | conserved hypothetical protein 686 aa |         |         | 400,59  | Ctrl_4h |
| PAAG_02004 | conserved hypothetical protein 908 aa | 666,05  | Ctrl_2h | 596,27  | 0,6440  |

<sup>a</sup> Accession number from FungiDB Database (<https://fungidb.org/fungidb/app>, accessed on 26 September 2022).

<sup>b</sup> Protein description according to FungiDB Database (<https://fungidb.org/fungidb/app>, accessed on 26 September 2022).

<sup>c</sup> Expression values of differentially expressed *P. lutzii* proteins after 2 h and 4 h of neutrophil contact compared to those that were not incubated with neutrophils. Expression pattern was obtained via ProteinLynx Global Server and

normalized with Phosphorylase B. Ctrl\_2h and Ctrl\_4h indicates that the protein was identified only in control without neutrophil contact.

<sup>d</sup> Biological process according to FungiDB (<https://fungidb.org/fungidb/>, accessed on 26 September 2022), Uniprot (<https://www.uniprot.org>, accessed on 28 September 2022) and KEGG (<https://www.genome.jp/pathway.html>, accessed on 28 September 2022) databases.
