# Supplementary material for: The Response of Paracoccidioides lutzii to the Interaction with Human Neutrophils
Source: MDPI journal article supplement (doi:10.3390/jof9111088), 2023-11-07
Supplement: s1 [file s1]

**Supplementary Table S2: Increased proteins after 2 h and/or 4 h of neutrophil interaction**

| Accession number <sup>a</sup>               | Description <sup>b</sup>                                           | 2h      |                    | 4h      |                    |
|---------------------------------------------|--------------------------------------------------------------------|---------|--------------------|---------|--------------------|
|                                             |                                                                    | Score   | Ratio <sup>c</sup> | Score   | Ratio <sup>c</sup> |
| Functional categories <sup>d</sup>          |                                                                    |         |                    |         |                    |
| METABOLISM                                  |                                                                    |         |                    |         |                    |
| Amino acid metabolism                       |                                                                    |         |                    |         |                    |
| PAAG_01310                                  | 2 oxoisovalerate dehydrogenase subunit alpha, mitochondrial 451 aa | 1608,93 | 0,7558             | 1272,27 | 1,6487             |
| PAAG_00468                                  | 4 aminobutyrate aminotransferase 286 aa                            | 20187,1 | 0,7047             | 13068,9 | 1,2092             |
| PAAG_01969                                  | arginase 325 aa                                                    |         |                    | 669,95  | Inf_4h             |
| PAAG_06407                                  | argininosuccinate lyase 300 aa                                     |         |                    | 1114,38 | 1,3231             |
| PAAG_03138                                  | alanine glyoxylate aminotransferase 494 a                          | 539,07  | Inf_2h             | 758,76  | 1,2586             |
| PAAG_08986                                  | cystathionine beta synthase 512 aa                                 |         |                    | 818,13  | Inf_4h             |
| PAAG_08701                                  | D 3 phosphoglycerate dehydrogenase 475 aa                          |         |                    | 519,81  | Inf_4h             |
| PAAG_02361                                  | D amino acid oxidase 335 aa                                        | 508,61  | Inf_2h             |         |                    |
| PAAG_07089                                  | homocitrate synthase 430 aa                                        | 3129,61 | 0,6250             | 1333,6  | 3,5609             |
| PAAG_03404                                  | ketol acid reductoisomerase 134 aa                                 |         |                    | 1684,66 | Inf_4h             |
| PAAG_01002                                  | NAD specific glutamate dehydrogenase 1104 aa                       |         |                    | 1784,4  | Inf_4h             |
| PAAG_08512                                  | serine hydroxymethyltransferase 536 aa                             |         |                    | 3558,18 | 1,2092             |
| Nucleotide/nucleoside/nucleobase metabolism |                                                                    |         |                    |         |                    |
| PAAG_00850                                  | glucosamine fructose 6 phosphate aminotransferase 678 aa           |         |                    | 971,76  | Inf_4h             |
| PAAG_05803                                  | inosine 5 monophosphate dehydrogenase IMD2 548 aa                  | 3894,28 | 0,6907             | 1002,1  | 1,4770             |
| PAAG_08856                                  | nicotinate nucleotide pyrophosphorylase 315 aa                     | 4347,86 | 1,5527             |         |                    |
| PAAG_01931                                  | phosphoacetylglucosamine mutase 549 aa                             |         |                    | 508,73  | Inf_4h             |
| Nitrogen, sulfur and selenium metabolism    |                                                                    |         |                    |         |                    |
| PAAG_06606                                  | cyanate hydratase 164 aa                                           |         |                    | 6398,52 | 1,3231             |
| PAAG_04966                                  | hydrolase 298 aa                                                   | 919,5   | 3,2220             |         |                    |

|                                                          |                                                         |         |         |         |        |
|----------------------------------------------------------|---------------------------------------------------------|---------|---------|---------|--------|
| PAAG_01321                                               | oxidoreductase 2 nitropropane dioxygenase family 368 aa |         |         | 4940,96 | 3,2871 |
| C-compound and carbohydrate metabolism                   |                                                         |         |         |         |        |
| PAAG_00889                                               | phosphomannomutase 269 aa                               |         |         | 1257,84 | 2,0340 |
| PAAG_04181                                               | sorbitol utilization protein SOU2 294 aa                | 677,65  | 1,5068  | 724,1   | 1,6161 |
| PAAG_06817                                               | UTP glucose 1 phosphate uridylyltransferase 507 aa      | 708,19  | 1,4333  |         |        |
| Lipid, fatty acid and isoprenoid metabolism              |                                                         |         |         |         |        |
| Synthesis                                                |                                                         |         |         |         |        |
| PAAG_01524                                               | fatty acid synthase subunit beta dehydratase 2086 aa    |         |         | 577,72  | 2,6379 |
| Oxidation                                                |                                                         |         |         |         |        |
| PAAG_08859                                               | peroxisomal multifunctional enzyme 902 aa               | 769,59  | 1,4333  | 523,81  | Inf_4h |
| PAAG_02664                                               | 3 ketoacyl CoA thiolase 418 aa                          | 13958,6 | 0,6250  | 11597,7 | 1,6161 |
| PAAG_05984                                               | glutaryl CoA dehydrogenase 429 aa                       | 1461,68 | Ctrl_2h | 677,97  | 1,3771 |
| Synthesis or oxidation                                   |                                                         |         |         |         |        |
| PAAG_01536                                               | trans 2 enoyl CoA reductase 415 aa                      |         |         | 507,87  | Inf_4h |
| PAAG_06309                                               | enoyl CoA hydratase 298 aa                              | 17940   | 1,2712  | 13795,2 | 1,3231 |
| PAAG_08277                                               | nitroreductase family protein 223 aa                    |         |         | 3671,63 | 1,4333 |
| Metabolism of vitamins, cofactors, and prosthetic groups |                                                         |         |         |         |        |
| PAAG_08166                                               | 4 hydroxyphenylpyruvate dioxygenase 404 a               | 14446,4 | 1,2337  |         |        |
| PAAG_00851                                               | 6 7 dimethyl 8 ribityllumazine synthase 174 aa          | 6124,13 | 1,6653  |         |        |
| Secondary metabolism                                     |                                                         |         |         |         |        |
| PAAG_01519                                               | inositol monophosphatase 304 aa                         |         |         | 837,82  | 3,8962 |
| <b>ENERGY</b>                                            |                                                         |         |         |         |        |
| Glycolysis and gluconeogenesis                           |                                                         |         |         |         |        |
| PAAG_03243                                               | glucose-6-phosphate 1-epimerase 318 aa                  |         |         | 416,19  | 3,2871 |
| PAAG_06172                                               | glucokinase 517 aa                                      |         |         | 1418,68 | 1,2969 |
| PAAG_02050                                               | pyruvate decarboxylase 575 aa                           | 9220,34 | 0,6570  | 4206,78 | 1,3634 |

|                                                                |                                                         |         |         |         |        |
|----------------------------------------------------------------|---------------------------------------------------------|---------|---------|---------|--------|
| PAAG_02869                                                     | phosphoglycerate kinase 418 aa                          |         |         | 4687,95 | 3,9749 |
| Tricarboxylic-acid pathway                                     |                                                         |         |         |         |        |
| PAAG_03296                                                     | 3 isopropylmalate dehydratase 749 aa                    | 1133,75 | Ctrl_2h | 573,44  | Inf_4h |
| PAAG_05151                                                     | ATP citrate lyase 487 aa                                |         |         | 572,1   | 3,7810 |
| PAAG_05150                                                     | ATP citrate synthase subunit 1 660 aa                   |         |         | 717,91  | 3,9749 |
| PAAG_08075                                                     | citrate synthase 475 aa                                 |         |         | 1874,99 | 2,0544 |
| PAAG_00417                                                     | succinyl CoA ligase subunit alpha 332 aa                | 2374,55 | 0,6376  | 2530,22 | 1,6487 |
| PAAG_01463                                                     | succinyl CoA ligase subunit beta 445 aa                 | 8229,16 | 0,6907  | 1872,59 | 3,6693 |
| Glyoxylate cycle                                               |                                                         |         |         |         |        |
| PAAG_04542                                                     | malate synthase 540 aa                                  | 7394,14 | 0,7788  | 1344,85 | 2,2933 |
| Methylcitrate cycle                                            |                                                         |         |         |         |        |
| PAAG_04550                                                     | 2 methylcitrate synthase 470 aa                         |         |         | 16022,9 | 1,5068 |
| Pyruvate dehydrogenase complex                                 |                                                         |         |         |         |        |
| PAAG_03330                                                     | dihydrolipoyl dehydrogenase 522 aa                      |         |         | 17342,5 | 1,2586 |
| PAAG_01534                                                     | pyruvate dehydrogenase E1 component subunit beta 377 aa | 14726,6 | 0,6376  | 13778,9 | 1,5527 |
| PAAG_02769                                                     | pyruvate dehydrogenase protein X component 495 aa       | 590,7   | Inf_2h  | 1278,94 | Inf_4h |
| Pentose-phosphate pathway                                      |                                                         |         |         |         |        |
| PAAG_01178                                                     | 6 phosphogluconate dehydrogenase 492 aa                 |         |         | 3180,28 | 1,3910 |
| PAAG_04166                                                     | transaldolase 325 aa                                    |         |         | 14718,3 | 1,5527 |
| Electron transport and membrane-associated energy conservation |                                                         |         |         |         |        |
| PAAG_07285                                                     | vacuolar ATP synthase catalytic subunit A 783 aa        | 2238,09 | 0,7334  | 462,71  | 1,9937 |
| PAAG_06288                                                     | vacuolar ATP synthase subunit B 507 aa                  | 979,35  | Inf_2h  | 448,4   | Inf_4h |
| PAAG_04838                                                     | ATP synthase subunit 4 245 aa                           | 1455,12 | Inf_2h  | 1379,83 | Inf_4h |
| PAAG_06268                                                     | cytochrome c 112 aa                                     |         |         | 1373,47 | 1,5683 |
| PAAG_01265                                                     | cytochrome b5 138 aa                                    | 1120,81 | 9,8749  | 4061,75 | 4,0148 |
| Fermentation                                                   |                                                         |         |         |         |        |

|                                      |                                                             |         |        |         |         |
|--------------------------------------|-------------------------------------------------------------|---------|--------|---------|---------|
| PAAG_05249                           | aldehyde dehydrogenase 497 aa                               |         |        | 8839,02 | 1,2461  |
| <b>Respiration</b>                   |                                                             |         |        |         |         |
| PAAG_00953                           | NADH cytochrome b5 reductase 334 aa                         |         |        | 1041,53 | Inf_4h  |
| PAAG_03309                           | suaprga1 307 aa                                             |         |        | 2875,94 | 1,5220  |
| <b>CELL CYCLE AND DNA PROCESSING</b> |                                                             |         |        |         |         |
| PAAG_08917                           | histone H2a 136 aa                                          | 1546,12 | Inf_2h |         |         |
| PAAG_07099                           | histone H3 3 137 aa                                         | 890,01  | 8,6711 | 1207,85 | 15,0293 |
| PAAG_07098                           | histone H4 1 104 aa                                         |         |        | 5861,19 | 8,0045  |
| PAAG_00126                           | histone H4 2 104 aa                                         | 2703,21 | 4,5267 | 5168,47 | Inf_4h  |
| PAAG_08918                           | late histone H2B L4 142 aa                                  | 2605,25 | 9,4877 | 3404,69 | 5,1039  |
| PAAG_05518                           | cell division cycle protein 821 aa                          | 11971,9 | 0,5326 | 6643,35 | 1,5068  |
| PAAG_04458                           | prohibitin 1 281 aa                                         |         |        | 1116,52 | 3,1899  |
| PAAG_07339                           | S phase kinase associated protein 1A 170 aa                 |         |        | 3757,53 | 2,3869  |
| PAAG_02522                           | U4/U6-U5 snRNP complex subunit LSM3 99 aa                   | 2616,42 | Inf_2h | 2243,15 | 1,1735  |
| <b>TRANSCRIPTION</b>                 |                                                             |         |        |         |         |
| PAAG_02255                           | mRNA decapping hydrolase 319 aa                             |         |        | 1619,71 | 1,2214  |
| PAAG_04571                           | nascent polypeptide associated complex subunit alpha 209 aa | 2821,62 | Inf_2h | 944,78  | 1,3910  |
| PAAG_00845                           | LSM domain containing protein 85 aa                         |         |        | 12807,7 | 1,3499  |
| PAAG_08234                           | transcription factor RfeF 557 aa                            |         |        | 2637,72 | 1,6820  |
| <b>PROTEIN SYNTHESIS</b>             |                                                             |         |        |         |         |
| PAAG_08634                           | 40S ribosomal protein S12 152 aa                            | 1056,59 | Inf_2h | 1352,36 | 1,7160  |
| PAAG_04690                           | 40S ribosomal protein S15 154 aa                            |         |        | 20017,8 | 1,4918  |
| PAAG_01413                           | 40S ribosomal protein S17 143 aa                            | 10167   | 1,2712 |         |         |
| PAAG_03513                           | 40S ribosomal protein S18 156 aa                            | 12629,8 | 1,3634 | 15025,4 | 1,2586  |
| PAAG_05805                           | 40S ribosomal protein S21 89 aa                             | 2170,98 | 2,2034 |         |         |
| PAAG_08540                           | 40S ribosomal protein S25 158 aa                            | 1090,62 | Inf_2h |         |         |

|                     |                                                                  |         |        |         |        |
|---------------------|------------------------------------------------------------------|---------|--------|---------|--------|
| PAAG_01785          | 40S ribosomal protein S3 271 aa                                  | 15397,7 | 1,4477 |         |        |
| PAAG_08955          | 40S ribosomal protein S3aE 256 aa                                |         |        | 16978   | 1,2214 |
| PAAG_00801          | 60S acidic ribosomal protein P0 lyase 314 aa                     |         |        | 2825,87 | 3,0344 |
| PAAG_07707          | 60S ribosomal protein L10a 230 aa                                |         |        | 3307,02 | 1,7333 |
| PAAG_05590          | 60S ribosomal protein L12 166 aa                                 |         |        | 7538,02 | 1,2969 |
| PAAG_05379          | 60S ribosomal protein L17 185 aa                                 | 4533,11 | 1,5841 | 3656,81 | 1,6989 |
| PAAG_08847          | 60S ribosomal protein L28 150 aa                                 | 845,39  | Inf_2h | 1341,68 | 1,2586 |
| PAAG_03019          | 60S ribosomal protein L6 B 205 aa                                | 4347,03 | 1,4049 | 3526,95 | 0,8958 |
| PAAG_07841          | 60S acidic ribosomal protein P1 111 aa                           |         |        | 33586,4 | 1,5527 |
| PAAG_00240          | eukaryotic translation initiation factor 5A 214 aa               | 3496,74 | 1,9348 | 4251,66 | 2,3632 |
| PAAG_04958          | eukaryotic translation initiation factor 6 248 aa                |         |        | 1126,62 | 2,1170 |
| PAAG_06084          | eukaryotic translation initiation factor 3 subunit B 737 aa      | 2568,27 | 0,6977 | 948,6   | 1,7860 |
| PAAG_08348          | eukaryotic translation initiation factor 3 39 kDa subunit 340 aa | 1260,28 | 0,4317 | 728,11  | Inf_4h |
| PAAG_00689          | ATP dependent RNA helicase eIF4A 399 aa                          | 1252,91 | 5,9895 | 2249,55 | Inf_4h |
| PAAG_04511          | ATP dependent RNA helicase SUB2 468 aa                           | 832,16  | Inf_2h |         |        |
| PAAG_02024          | elongation factor 1 alpha 461 aa                                 | 33947,7 | 1,5683 | 7548,89 | 2,2933 |
| PAAG_03028          | elongation factor 1 beta 233 aa                                  |         |        | 15183,9 | 1,8776 |
| PAAG_03556          | elongation factor 1 gamma 1 408 aa                               |         |        | 2115,4  | 5,7546 |
| PAAG_00594          | elongation factor 2 832 aa                                       |         |        | 4047,29 | 3,9354 |
| PAAG_02921          | elongation factor Tu 442 aa                                      |         |        | 1874,04 | 1,8040 |
| PAAG_00150          | arginyl tRNA synthetase 585 aa                                   |         |        | 786,76  | 1,6820 |
| PAAG_07028          | histidyl tRNA synthetase 602 aa                                  | 2870,5  | 0,7634 | 915,47  | 2,3869 |
| PAAG_04742          | valyl tRNA synthetase 1052 aa                                    | 4052,96 | 0,8270 | 896,85  | 1,4770 |
| PAAG_03951          | prolyl tRNA synthetase 639 aa                                    |         |        | 494,17  | Inf_4h |
| <b>PROTEIN FATE</b> |                                                                  |         |        |         |        |
| PAAG_07802          | proteasome component PRE6 270 aa                                 | 6777,95 | 1,3634 | 6003,98 | 1,2337 |

|                                                                      |                                                    |         |         |         |        |
|----------------------------------------------------------------------|----------------------------------------------------|---------|---------|---------|--------|
| PAAG_03687                                                           | proteasome component PUP2 246 aa                   | 5126,04 | 1,6653  | 3431,85 | 1,2712 |
| PAAG_00664                                                           | aspartyl aminopeptidase 607 aa                     |         |         | 920,97  | 1,8404 |
| PAAG_01926                                                           | 26S protease regulatory subunit 6A 462 aa          |         |         | 649,55  | 2,7732 |
| PAAG_08931                                                           | glutamate carboxypeptidase 579 aa                  |         |         | 6157,94 | 0,9704 |
| PAAG_08184                                                           | T complex protein 1 epsilon subunit 569 aa         | 1590,79 | Ctrl_2h | 567,87  | Inf_4h |
| PAAG_06068                                                           | T complex protein 1 subunit beta 555 aa            |         |         | 2039,31 | Inf_4h |
| PAAG_01727                                                           | T complex protein 1 subunit delta 511 aa           |         |         | 493,75  | Inf_4h |
| PAAG_07851                                                           | T complex protein 1 subunit eta 564 aa             |         |         | 595,7   | Inf_4h |
| PAAG_07165                                                           | T complex protein 1 subunit gamma 539 aa           | 1708,27 | 2,5345  | 926,09  | Inf_4h |
| PAAG_03932                                                           | E1 ubiquitin-activating protein UBA1 1030 aa       |         |         | 720,12  | 2,0751 |
| PAAG_06536                                                           | ubiquitin 155 aa                                   | 14106,8 | 1,5841  | 30475,3 | 1,5068 |
| PAAG_04901                                                           | ubiquitin conjugating enzyme 252 aa                |         |         | 3594,14 | 1,3231 |
| PAAG_02773                                                           | ubiquitin conjugating enzyme variant MMS2 134 aa   | 1768,81 | Inf_2h  |         |        |
| PAAG_03038                                                           | ubiquitin like modifier SUMO 94 aa                 | 809,15  | Inf_2h  |         |        |
| PAAG_09072                                                           | mitochondrial nuclease 336 aa                      |         |         | 1052,2  | 2,7732 |
| PAAG_00797                                                           | mitochondrial protein import protein MAS5 410 aa   |         |         | 618,62  | 2,4109 |
| PAAG_07490                                                           | monothiol glutaredoxin 5 160 aa                    | 1492,76 | 1,6000  |         |        |
| PAAG_01588                                                           | SNARE Ykt6 227 aa                                  |         |         | 507,68  | Inf_4h |
| <b>CELLULAR TRANSPORT, TRANSPORT FACILITIES AND TRANSPORT ROUTES</b> |                                                    |         |         |         |        |
| PAAG_04651                                                           | GTP binding nuclear protein GSP1 Ran 216 aa        |         |         | 2492,33 | 7,8460 |
| PAAG_08028                                                           | GTP binding protein ypt1 202 aa                    |         |         | 4126,31 | 1,2840 |
| PAAG_02458                                                           | GTP binding protein ypt7 206 aa                    | 1749,94 | 5,1552  | 2446,88 | Inf_4h |
| PAAG_07773                                                           | cyclin dependent kinases regulatory subunit 113 aa | 839,65  | Inf_2h  |         |        |
| PAAG_06233                                                           | vesicular fusion protein SEC17 293 aa              |         |         | 1208,71 | 1,3499 |
| PAAG_06751                                                           | DNA damage checkpoint protein rad24 266 aa         |         |         | 36294,6 | 1,5373 |
| PAAG_00773                                                           | DNA damage checkpoint protein rad24 293 aa         |         |         | 24464,7 | 1,7507 |

|                                                              |                                                                  |         |        |         |        |
|--------------------------------------------------------------|------------------------------------------------------------------|---------|--------|---------|--------|
| PAAG_08697                                                   | myosin 2 2021 aa                                                 | 504,3   | Inf_2h | 733,47  | Inf_4h |
| PAAG_03188                                                   | nuclear movement protein nudC 199 aa                             | 13017,4 | 0,7483 | 12124,3 | 1,2461 |
| PAAG_02186                                                   | nuclear segregation protein Bfr1 505 aa                          | 1144,93 | 1,6000 | 583,73  | 1,3364 |
| PAAG_07564                                                   | mitochondrial outer membrane protein porin 214 aa                | 1497,73 | 1,7160 | 1514,36 | Inf_4h |
| PAAG_07900                                                   | phosphatidylinositol phosphatidylcholine transfer protein 353 aa |         |        | 951,69  | Inf_4h |
| PAAG_04276                                                   | phosphatidylinositol transporter 461 aa                          |         |        | 2291,86 | 1,5373 |
| PAAG_08082                                                   | plasma membrane ATPase 930 aa                                    |         |        | 536,84  | 1,5683 |
| <b>CELLULAR COMMUNICATION/SIGNAL TRANSDUCTION MECHANISM</b>  |                                                                  |         |        |         |        |
| PAAG_06344                                                   | rab GDP dissociation inhibitor 469 aa                            |         |        | 2510,33 | Inf_4h |
| PAAG_00782                                                   | small COPII coat GTPase sar1 190 aa                              | 2941,92 | 2,5345 | 2766,75 | Inf_4h |
| PAAG_07634                                                   | small GTPase RhoA 192 aa                                         | 22225,1 | 0,7047 | 14067,6 | 1,2214 |
| PAAG_01280                                                   | ser Thr protein phosphatase family protein 754 aa                |         |        | 707,54  | Inf_4h |
| <b>BIOGENESIS OF CELLULAR COMPONENTS</b>                     |                                                                  |         |        |         |        |
| PAAG_00564                                                   | actin 390 aa                                                     | 604,25  | Inf_2h |         |        |
| PAAG_02396                                                   | actin 441 aa                                                     | 3607,76 | 0,6065 | 736,48  | Inf_4h |
| PAAG_01347                                                   | actin cytoskeleton protein VIP1 267 aa                           |         |        | 8839,02 | 1,4918 |
| PAAG_03624                                                   | Arp2 3 complex subunit Arc16 314 aa                              | 828,45  | 1,5068 |         |        |
| PAAG_08973                                                   | tropomyosin 1 162 aa                                             | 10445,4 | 1,4191 |         |        |
| <b>PROTEIN WITH BINDING FUNCTION OR COFACTOR REQUIREMENT</b> |                                                                  |         |        |         |        |
| PAAG_08620                                                   | ADP ATP carrier protein 310 aa                                   |         |        | 1479,12 | Inf_4h |
| PAAG_08247                                                   | calmodulin 150 aa                                                | 22326,5 | 1,4049 | 12134,5 | 1,6000 |
| PAAG_05827                                                   | glycolipid transferprotein HET C2 209 aa                         | 623,08  | 1,9937 | 392,21  | 3,1899 |
| PAAG_06917                                                   | KH domain RNA binding protein 365 aa                             |         |        | 424,32  | 2,3632 |
| PAAG_04814                                                   | nucleic acid binding protein 274 aa                              | 2334,7  | 1,3771 |         |        |
| PAAG_00244                                                   | polyadenylate binding protein 823 aa                             |         |        | 1008,67 | 2,4843 |
| PAAG_01097                                                   | PolyrC binding protein 496 aa                                    |         |        | 691,9   | Inf_4h |

## CELL RESCUE, DEFENSE AND VIRULENCE

### Stress response

|            |                                             |         |         |         |        |
|------------|---------------------------------------------|---------|---------|---------|--------|
| PAAG_08059 | heat shock protein 60, mitochondrial 593 aa | 63936,1 | 1,1735  | 94762,2 | 1,2586 |
| PAAG_05679 | heat shock protein 90 696 aa                | 10124,2 | 1,4049  | 2445,18 | 8,7583 |
| PAAG_02130 | heat shock protein HSP98 927 aa             | 454,65  | Inf_2h  | 495,7   | Inf_4h |
| PAAG_07775 | heat shock protein SSB1 558 aa              |         |         | 4119,21 | 1,8404 |
| PAAG_06811 | heat shock protein STI1 579 aa              | 4905,25 | 1,2712  | 5090,56 | 1,5841 |
| PAAG_01262 | hsp70 like protein 629 aa                   |         |         | 9929,8  | 2,0751 |
| PAAG_05226 | Hsp90 binding co chaperone Sba1 197 aa      |         |         | 1082,55 | 1,2712 |
| PAAG_02686 | Hsp90 co chaperone AHA1 330 aa              | 603,4   | Ctrl_2h | 445,02  | 2,0959 |
| PAAG_08260 | Hsp90 co chaperone Cdc37 508 aa             | 3215,48 | 1,6989  | 1060,07 | 2,8577 |

### Detoxification

|            |                                     |         |        |         |        |
|------------|-------------------------------------|---------|--------|---------|--------|
| PAAG_01454 | peroxissomal catalase 290 aa        | 3725,29 | 1,7860 | 4819,99 | 1,1503 |
| PAAG_02725 | superoxide dismutase [Fe-Mn] 228 aa |         |        | 2586,35 | 3,7810 |
| PAAG_02926 | superoxide dismutase [Fe-Mn] 249 aa |         |        | 965,4   | 1,4191 |
| PAAG_04164 | superoxide dismutase [Cu-Zn] 155 aa | 2192,1  | 1,5683 | 3412,51 | 2,3396 |

### UNCLASSIFIED

|            |                                                               |         |        |         |        |
|------------|---------------------------------------------------------------|---------|--------|---------|--------|
| PAAG_00932 | dynein light chain 95 aa                                      |         |        | 1512,92 | Inf_4h |
| PAAG_03152 | CobW domain containing protein 434 aa                         |         |        | 436,09  | 3,3535 |
| PAAG_08313 | L-PSP endoribonuclease family protein Hmf1 125 aa             | 37221,2 | 1,2214 |         |        |
| PAAG_01399 | NAD dependent epimerase/dehydratase family protein 286 aa     |         |        | 2069    | 1,8221 |
| PAAG_07573 | predicted protein 141 aa                                      |         |        | 671     | Inf_4h |
| PAAG_03537 | lysine decarboxylase-like protein 251 aa                      |         |        | 4968,03 | 1,4623 |
| PAAG_05701 | putative transformer-SR ribonucleo protein 308 aa             | 945,03  | Inf_2h |         |        |
| PAAG_08058 | cofilin 197 aa                                                |         |        | 2125,96 | 3,6693 |
| PAAG_05019 | Hnt1 cyclin dependent kinase Kin28 interacting protein 137 aa | 11759,5 | 0,7483 | 18701,9 | 1,3910 |



|            |                                       |         |        |         |        |
|------------|---------------------------------------|---------|--------|---------|--------|
| PAAG_01591 | hypothetical protein 149 aa           | 4091,65 | 1,5220 |         |        |
| PAAG_00772 | hypothetical protein 286 aa           |         |        | 1008,22 | Inf_4h |
| PAAG_03092 | hypothetical protein 587 aa           | 2800,76 | 0,8106 | 3054,46 | 1,3910 |
| PAAG_00573 | hypothetical protein 71 aa            | 562,59  | Inf_2h |         |        |
| PAAG_06462 | hypothetical protein 106 aa           | 1273,78 | Inf_2h | 5079,83 | 1,7507 |
| PAAG_01158 | conserved hypothetical protein 121 aa | 3760,38 | 1,3910 |         |        |
| PAAG_03129 | conserved hypothetical protein 144 aa |         |        | 1470,99 | Inf_4h |
| PAAG_07875 | conserved hypothetical protein 161 aa | 4399,39 | 1,6487 | 3836,2  | 1,2461 |
| PAAG_05856 | conserved hypothetical protein 168 aa |         |        | 3799,36 | 1,2586 |
| PAAG_00340 | conserved hypothetical protein 174 aa |         |        | 3253,81 | 1,3231 |
| PAAG_00350 | conserved hypothetical protein 196 aa |         |        | 514     | Inf_4h |
| PAAG_06955 | conserved hypothetical protein 289 aa |         |        | 2405,82 | 1,5527 |
| PAAG_04274 | conserved hypothetical protein 309 aa |         |        | 1751,7  | 1,5068 |
| PAAG_07989 | conserved hypothetical protein 485 aa |         |        | 680,3   | 1,9937 |

<sup>a</sup> Accession number from FungiDB Database (<https://fungidb.org/fungidb/app>, accessed on 26 September 2022).

<sup>b</sup> Protein description according to FungiDB Database (<https://fungidb.org/fungidb/app>, accessed on 26 September 2022).

<sup>c</sup> Expression values of differentially expressed *P. lutzii* proteins after 2 h and 4 h of neutrophil contact compared to those that were not incubated with neutrophils. Expression pattern was obtained via ProteinLynx Global Server and normalized with Phosphorylase B. Inf\_2h and Inf\_4h indicates that the protein was identified only after 2 h or 4 h, respectively, of neutrophil incubation compared to control without contact.

<sup>d</sup> Biological process according to FungiDB (<https://fungidb.org/fungidb/>, accessed on 26 September 2022), Uniprot (<https://www.uniprot.org>, accessed on 28 September 2022) and KEGG (<https://www.genome.jp/pathway.html>, accessed on 28 September 2022) databases.
