# Supplementary material for: The Response of Paracoccidioides lutzii to the Interaction with Human Neutrophils
Source: J Fungi (Basel). 2023 Nov 7;9(11):1088. doi: 10.3390/jof9111088 (PMC10672145; doi:10.3390/jof9111088)
Supplement: Supplementary file 1 [file jof-09-01088-s001.zip]

Archive with 4 entries (4 files):
- Figure S1.pdf
- Supplementary Table S1.xlsx
- Supplementary Table S2.pdf
- Supplementary Table S3.pdf
