# Supplementary material for: The Response of Paracoccidioides lutzii to the Interaction with Human Neutrophils
Source: J Fungi (Basel). 2023 Nov 7;9(11):1088. doi: 10.3390/jof9111088 (PMC10672145; doi:10.3390/jof9111088)
Supplement: Supplementary file 1 [file jof-09-01088-s001.zip › Supplementary Table S1.xlsx]

## Sheet: Planilha1
Supplementary Table S1: Proteins identified after 2 h and/or 4 h of neutrophil interaction
		2h		4h
Acession numbera	Descriptionb	Score	Ratioc	Score	Ratioc
Functional categoriesd
METABOLISM
Amino acid metabolism
PAAG_02975	2 4 dihydroxyhept 2 ene 1 7 dioic acid al	1888.58	0.571209
PAAG_01310	2 oxoisovalerate dehydrogenase subunit al	1608.93	0.755784	1272.27	1.64872
PAAG_01194	2 oxoisovalerate dehydrogenase subunit be			2355.19	1.10517
PAAG_00468	4 aminobutyrate aminotransferase 286 aa	20187.1	0.704688	13068.9	1.20925
PAAG_07563	asparagine synthetase 579 aa	1206.64	Ctrl_2h	553.21	Ctrl_4h
PAAG_02603	aspartate aminotransferase 430 aa	8696.34	0.600496	3784.46	1.03045
PAAG_01144	aspartate aminotransferase 440 aa			2711.59	1.13883
PAAG_08065	aspartate semialdehyde dehydrogenase 395			1286.61	0.852144
PAAG_00221	acetolactate synthase 674 aa	5089.81	0.802519	3459.44	0.941765
PAAG_02163	acetyl propionyl coenzyme A carboxylase	933.69	Ctrl_2h	522.64	Ctrl_4h
PAAG_01969	arginase 325 aa			669.95	Inf_4h
PAAG_06407	argininosuccinate lyase 300 aa			1114.38	1.32313
PAAG_07114	argininosuccinate synthase 414 aa	5785.46	0.763379	4455.14	1.09417
PAAG_02859	adenosylhomocysteinase 448 aa			39177.7	0.970446
PAAG_03138	alanine glyoxylate aminotransferase 494 a	539.07	Inf_2h	758.76	1.2586
PAAG_01563	aromatic L amino acid decarboxylase 546 a	1304.2	Ctrl_2h
PAAG_05005	anthranilate synthase component 1 556 aa	2234.65	0.527292
PAAG_08668	anthranilate synthase component 2 772 aa	1416.12	0.522046	1481.93	1.1853
PAAG_03045	aminomethyltransferase 491 aa	8640.31	0.565525	6447.76	0.67032
PAAG_08405	cystathionine beta lyase 448 aa			415.33	Ctrl_4h
PAAG_08986	cystathionine beta synthase 512 aa			818.13	Inf_4h
PAAG_04701	cystathionine gamma lyase 419 aa	2216.06	Ctrl_2h
PAAG_05851	cysteine desulfurase 501 aa	1622.22	Ctrl_2h	1386.87	Ctrl_4h
PAAG_08649	cysteine dioxygenase 220 aa			951.94	Ctrl_4h
PAAG_05860	glutamate cysteine ligase 283 aa	819.8	Ctrl_2h
PAAG_03506	glutamate decarboxylase 517 aa			472.41	Ctrl_4h
PAAG_02070	glutaminase A 904 aa	895.23	Ctrl_2h	1125.27	Ctrl_4h
PAAG_07003	glutamine synthetase 359 aa			632.28	Ctrl_4h
PAAG_04525	glutamine synthetase 487 aa	967.69	Ctrl_2h
PAAG_08701	D 3 phosphoglycerate dehydrogenase 475 aa			519.81	Inf_4h
PAAG_02361	D amino acid oxidase 335 aa	508.61	Inf_2h
PAAG_05253	delta 1 pyrroline 5 carboxylate dehydroge	16182.9	0.67032	11454.1	0.794534
PAAG_05776	dihydroxy acid dehydratase 606 aa			6103.76	0.67032
PAAG_08163	fumarylacetoacetase 429 aa	9049.69	0.843665	6443.64	0.726149
PAAG_08585	thiosulfate sulfurtransferase 345 aa	1136	Ctrl_2h
PAAG_09095	ATP phosphoribosyltransferase 328 aa	778.5	Ctrl_2h
PAAG_04401	branched chain amino acid aminotransferas			6446.96	1.1275
PAAG_01365	choline dehydrogenase 543 aa			1837.02	0.860708
PAAG_07659	chorismate synthase 374 aa	1086.82	Ctrl_2h	540.46	Ctrl_4h
PAAG_07626	Cobalamin independent synthase 772 aa			11380.5	0.88692
PAAG_02935	glycine cleavage system H protein 184 aa			3117.58	1.0202
PAAG_01568	glycine dehydrogenase 1184 aa	4837.58	0.748264	3537.55	0.794534
PAAG_05406	histidine biosynthesis trifunctional prot	5149.11	0.748264	2459.18	1.40495
PAAG_00106	histone acetyltransferase type B catalyti	565.48	Ctrl_2h
PAAG_01929	HNRNP arginine N methyltransferase 308 aa	4303.5	Ctrl_2h	2303.04	Ctrl_4h
PAAG_07089	homocitrate synthase 430 aa	3129.61	0.625002	1333.6	3.56085
PAAG_08164	homogentisate 1 2 dioxygenase 455 aa	15238	1.07251	30299.2	0.932394
PAAG_01991	homoserine dehydrogenase 373 aa	4785.64	0.625002	7724.16	0.860708
PAAG_04348	homoserine kinase 359 aa	925.73	0.690734	3190.53	0.932394
PAAG_06215	hydroxymethylglutaryl CoA lyase 357 aa	997.93	0.683861	1858.6	0.71177
PAAG_04102	isovaleryl CoA dehydrogenase 431 aa	9310.11	0.631284
PAAG_03404	ketol acid reductoisomerase 134 aa			1684.66	Inf_4h
PAAG_02644	kynurenine oxoglutarate transaminase 452			2094.04	1.05127
PAAG_08162	maleylacetoacetate isomerase 158 aa	976.1	Ctrl_2h	5213.06	0.329559
PAAG_04103	methylcrotonoyl CoA carboxylase beta chai			6011.44	0.67032
PAAG_01002	NAD specific glutamate dehydrogenase 1104			1784.4	Inf_4h
PAAG_07689	NADP specific glutamate dehydrogenase 459			15616.4	1.08329
PAAG_08100	O acetylhomoserine thiol lyase 440 aa			28652.2	0.625002
PAAG_06431	ornithine aminotransferase 461 aa	10648.1	0.771052	5013.39	0.970446
PAAG_07317	PENR2 protein 314 aa	784.59	Ctrl_2h
PAAG_03237	phospho 2 dehydro 3 deoxyheptonate aldola			490.52	Ctrl_4h
PAAG_06096	phospho 2 dehydro 3 deoxyheptonate aldola	595.13	Ctrl_2h
PAAG_07243	phosphoribosylformylglycinamidine synthas	837.86	Ctrl_2h	721.79	Ctrl_4h
PAAG_01302	phosphorylase family protein 312 aa			2321.98	0.878095
PAAG_02901	S adenosylmethionine synthetase 386 aa			8276.28	1.09417
PAAG_02693	saccharopine dehydrogenase 451 aa	2258.2	0.625002	2789.61	0.895834
PAAG_02354	serine 3 dehydrogenase 249 aa	27845.5	0.463013	6357.09	1.43333
PAAG_07412	serine hydroxymethyltransferase 472 aa	7760.84	0.67032	11005.2	1.16183
PAAG_08512	serine hydroxymethyltransferase 536 aa			3558.18	1.20925
PAAG_04443	spermidine synthase 289 aa			4704.28	1.06184
Nucleotide/nucleoside/nucleobase metabolism
PAAG_07312	CTP synthase 587 aa	790.76	Ctrl_2h
PAAG_00433	adenosine kinase 336 aa			3094.04	1
PAAG_04974	adenylosuccinate lyase 485 aa			1806.65	0.763379
PAAG_02170	adenylosuccinate synthetase 422 aa			3111.03	0.740818
PAAG_07428	allantoinase 553 aa	727.67	Ctrl_2h
PAAG_08152	3 5 bisphosphate nucleotidase 353 aa			398.06	Ctrl_4h
PAAG_05611	deoxyuridine 5 triphosphate nucleotidohy	2163.92	0.527292	7455.38	1
PAAG_00850	glucosamine fructose 6 phosphate aminotra			971.76	Inf_4h
PAAG_05392	betaine aldehyde dehydrogenase 479 aa			5498.65	0.697676
PAAG_01369	betaine aldehyde dehydrogenase 500 aa	588.19	Ctrl_2h
PAAG_00731	bifunctional purine biosynthesis protein	18815	0.565525	17866.3	0.860708
PAAG_05803	inosine 5 monophosphate dehydrogenase IM	3894.28	0.690734	1002.1	1.47698
PAAG_08856	nicotinate nucleotide pyrophosphorylase 3	4347.86	1.55271	8404.47	1.0202
PAAG_04291	nucleoside diphosphate kinase 153 aa	29710.7	1.11628	41637.5	0.852144
PAAG_07529	orotidine 5 phosphate decarboxylase 162			1489.66	0.778801
PAAG_01931	phosphoacetylglucosamine mutase 549 aa			508.73	Inf_4h
PAAG_03530	phosphoribosylamine glycine ligase 805 aa	619.65	Ctrl_2h	862.62	Ctrl_4h
Nitrogen, sulfur and selenium metabolism
PAAG_00954	urease 837 aa			687.22	Ctrl_4h
PAAG_06237	urease accessory protein ureG 271 aa	1079.66	Ctrl_2h
PAAG_01437	uricase 308 aa			3226.65	1.0202
PAAG_06606	cyanate hydratase 164 aa			6398.52	1.32313
PAAG_03333	formamidase 416 aa			4943.65	1.16183
PAAG_04966	hydrolase 298 aa	919.5	3.22199
PAAG_01321	oxidoreductase 2 nitropropane dioxygenase	8289.84	1.19722	4940.96	3.28708
PAAG_07811	sulfite oxidase 449 aa	3031.88	0.748264	3591.64	0.970446
Phosphate metabolism
PAAG_00661	4 nitrophenylphosphatase 308 aa	1009.37	Ctrl_2h	371.08	Ctrl_4h
C-compound and carbohydrate metabolism
PAAG_03978	3 hydroxyisobutyrate dehydrogenase 345 aa	6701.68	0.625002	10279.1	0.869358
PAAG_02554	3 hydroxyisobutyryl CoA hydrolase 512 aa	2187.76	3.03436
PAAG_05780	2 5 diketo D gluconic acid reductase A 28	1291.25	0.644036
PAAG_04233	2 nitropropane dioxygenase 331 aa	602.78	Ctrl_2h
PAAG_04526	3 beta hydroxysteroid dehydrogenase 276 a			955.22	Ctrl_4h
PAAG_05761	4 carboxymuconolactone decarboxylase fami	765.12	Ctrl_2h
PAAG_00685	alpha mannosidase 1098 aa	3444.93	0.755784	3195.12	0.99005
PAAG_07804	D lactate dehydrogenase 525 aa	1058.05	0.748264	2674.49	0.980199
PAAG_01885	galactokinase 529 aa	849.84	Ctrl_2h
PAAG_05716	carbonic anhydrase 283 aa			4251.98	0.932394
PAAG_05690	esterase D 287 aa			1740.25	0.810584
PAAG_00545	glycogen phosphorylase 878 aa			2466.66	0.904837
PAAG_07276	glycogen synthase 711 aa	866.96	Ctrl_2h	552.26	Ctrl_4h
PAAG_06473	mannitol 1 phosphate 5 dehydrogenase 389	6950.11	0.755784	10457.5	0.771052
PAAG_04602	mannosyl oligosaccharide glucosidase 850	733.45	0.637628
PAAG_08351	isocitrate dehydrogenase [NADP], mitochondrial			1413.59	Ctrl_4h
PAAG_04290	neutral alpha glucosidase AB 970 aa			603.25	Ctrl_4h
PAAG_00889	phosphomannomutase 269 aa			1257.84	2.03399
PAAG_02115	ribose phosphate pyrophosphokinase 455 aa	1080.21	Ctrl_2h
PAAG_03774	S hydroxymethylglutathione dehydrogenase			1273.54	0.852144
PAAG_04181	sorbitol utilization protein SOU2 294 aa	677.65	1.50682	724.1	1.61607
PAAG_06817	UTP glucose 1 phosphate uridylyltransfera	708.19	1.43333
Lipid, fatty acid and isoprenoid metabolism
Synthesis
PAAG_01525	fatty acid synthase subunit alpha reducta	773.66	Ctrl_2h
PAAG_04963	oleate induced peroxisomal protein 130 aa	4624.27	Ctrl_2h
PAAG_02150	acyl CoA thioesterase II 356 aa	581.45	Ctrl_2h	403.03	Ctrl_4h
PAAG_04374	nonspecific lipid transfer protein 399 aa			1891.85	1.0202
PAAG_01524	fatty acid synthase subunit beta dehydrat	1540.72	0.650509	577.72	2.63794
PAAG_01870	3-oxoacyl-[acyl-carrier protein] reductase	1087.92	Ctrl_2h	539.53	Ctrl_4h
PAAG_05151	ATP citrate lyase 487 aa			572.1	3.78104
Oxidation
PAAG_03116	acyl coenzyme A oxidase 683 aa	699.66	Ctrl_2h
PAAG_06224	carnitine O acetyltransferase 611 aa			2634.4	0.677057
PAAG_08859	peroxisomal multifunctional enzyme 902 aa	769.59	1.43333	523.81	Inf_4h
PAAG_06175	peroxisomal matrix protein 167 aa			23537.1	0.826959
PAAG_07746	3 ketoacyl CoA thiolase 422 aa	1286.87	Ctrl_2h
PAAG_02664	3 ketoacyl CoA thiolase 418 aa	13958.6	0.625002	11597.7	1.61607
PAAG_03689	3 ketoacyl CoA thiolase B 420 aa	11777.1	0.565525	9649.39	0.618783
PAAG_05454	acyl CoA dehydrogenase 440 aa	11957.5	0.71177	12158.1	0.683861
PAAG_07786	acetyl CoA acetyltransferase 400 aa	9270.93	0.771052	8187.1	0.932394
PAAG_03447	acetyl CoA acetyltransferase 439 aa	4561.71	0.704688	3081.38	0.878095
PAAG_00435	R benzylsuccinyl CoA dehydrogenase 445 aa			1050.16	Ctrl_4h
PAAG_05984	glutaryl CoA dehydrogenase 429 aa	1461.68	Ctrl_2h	677.97	1.37713
Synthesis or oxidation
PAAG_06329	3 hydroxybutyryl CoA dehydrogenase 322 aa	10656.2	0.778801	6152.27	1.11628
PAAG_01833	2 succinylbenzoate CoA ligase 583 aa	1419.62	Ctrl_2h
PAAG_07631	short chain dehydrogenase reductase famil	1347.16	Ctrl_2h
PAAG_05093	succinyl CoA 3 ketoacid coenzyme A transf	10251	0.600496	7115.22	0.810584
PAAG_01536	trans 2 enoyl CoA reductase 415 aa			507.87	Inf_4h
PAAG_06309	enoyl CoA hydratase 298 aa	17940	1.27125	13795.2	1.32313
PAAG_03216	mitochondrial peroxiredoxin PRX1 223 aa	7533.36	0.771052	11639.6	0.537944
PAAG_08277	nitroreductase family protein 223 aa			3671.63	1.43333
Metabolism of vitamins, cofactors, and prosthetic groups
PAAG_08166	4 hydroxyphenylpyruvate dioxygenase 404 a	14446.4	1.23368	14771.5	1.10517
PAAG_00851	6 7 dimethyl 8 ribityllumazine synthase 1	6124.13	1.66529	4911.44	1.04081
PAAG_04294	methylenetetrahydrofolate reductase 714 a	1726.81	Ctrl_2h	730.66	Ctrl_4h
PAAG_07036	methylmalonate semialdehyde dehydrogenase	14768.5	0.537944	6667.2	0.99005
PAAG_07321	pyridoxine biosynthesis protein PDX1 325			20826.9	1.1853
PAAG_00293	quinone oxidoreductase 203 aa			857	Ctrl_4h
PAAG_02382	quinone oxidoreductase 392 aa	5822.92	0.594521	4744.35	0.778801
PAAG_01934	riboflavin synthase alpha chain 239 aa			3779.56	Ctrl_4h
PAAG_08349	C 1 tetrahydrofolate synthase 940 aa	906.97	Ctrl_2h
Secondary metabolism
PAAG_04888	4 coumarate CoA ligase 583 aa	1354.96	Ctrl_2h
PAAG_01324	folic acid synthesis protein 601 aa			3430.48	0.631284
PAAG_07591	diphosphomevalonate decarboxylase 406 aa	1029.09	Ctrl_2h
PAAG_01519	inositol monophosphatase 304 aa			837.82	3.89619
PAAG_03960	isopentenyl diphosphate Delta isomerase 2	1187.53	Ctrl_2h	1642.61	Ctrl_4h
ENERGY
Glycolysis and gluconeogenesis
PAAG_02011	phosphoglucomutase 763 aa	2299.35	0.794534	2308.03	0.683861
PAAG_03243	glucose-6-phosphate 1-epimerase			416.19	3.28708
PAAG_01015	hexokinase 428 aa			1743.78	0.810584
PAAG_00771	enolase 405 aa	56020.4	1.15027	58117.4	0.852144
PAAG_03643	6 phosphofructo 2 kinase 535 aa	745.82	Ctrl_2h
PAAG_07410	2 3 bisphosphoglycerate independent phosp			10248.3	0.895834
PAAG_06172	glucokinase 517 aa			1418.68	1.29693
PAAG_06526	glucose 6 phosphate isomerase 553 aa	4987.89	0.852144	6368.79	0.88692
PAAG_08468	glyceraldehyde 3 phosphate dehydrogenase	52210.4	1.73325	56727.1	0.778801
PAAG_02682	fructose 1 6 bisphosphatase 355 aa			8824.58	0.895834
PAAG_01995	fructose bisphosphate aldolase 361 aa	19801.4	0.778801	16142.1	0.970446
PAAG_02585	triosephosphate isomerase 250 aa	17069.2	0.818731	22836.5	0.802519
PAAG_02050	pyruvate decarboxylase 575 aa	9220.34	0.657047	4206.78	1.36343
PAAG_08203	phosphoenolpyruvate carboxykinase 578 aa	5972.56	0.740818	9191.5	0.644036
PAAG_02869	phosphoglycerate kinase 418 aa	12195.1	1.10517	4687.95	3.9749
PAAG_06380	pyruvate kinase 535 aa	30539.4	0.516851	22075.3	0.818731
Tricarboxylic-acid pathway
PAAG_07843	aconitate hydratase 801 aa	585.32	Ctrl_2h
PAAG_04559	2 methylcitrate dehydratase 562 aa	46994	0.904837	59883.6	0.802519
PAAG_05328	3 isopropylmalate dehydrogenase A 363 aa	606.42	Ctrl_2h	555.77	Ctrl_4h
PAAG_03296	3 isopropylmalate dehydratase 749 aa	1133.75	Ctrl_2h	573.44	Inf_4h
PAAG_05048	3 isopropylmalate dehydratase large subun	17412.9	0.612626	16139.1	0.637628
PAAG_00726	pyruvate carboxylase 1197 aa	2817.76	0.794534	2301.26	0.970446
PAAG_08449	malate dehydrogenase 332 aa			46921.7	0.895834
PAAG_00053	malate dehydrogenase 341 aa			87466	1.09417
PAAG_02732	2 oxoglutarate dehydrogenase E1 1073 aa	2180.27	0.690734	2151.35	0.951229
PAAG_05150	ATP citrate synthase subunit 1 660 aa			717.91	3.9749
PAAG_08075	citrate synthase 475 aa			1874.99	2.05443
PAAG_08915	dihydrolipoamide succinyltransferase 514			7643.86	1.09417
PAAG_01725	succinate dehydrogenase flavoprotein subu	2090.06	0.771052	6260.18	0.631284
PAAG_04238	succinate dehydrogenase flavoprotein subu			45.51	0.895834
PAAG_06103	succinate dehydrogenase iron sulfur subun			1936.28	Ctrl_4h
PAAG_08718	succinate semialdehyde dehydrogenase 498			1224.48	1.13883
PAAG_00417	succinyl CoA ligase subunit alpha 332 aa	2374.55	0.637628	2530.22	1.64872
PAAG_01463	succinyl CoA ligase subunit beta 445 aa	8229.16	0.690734	1872.59	3.6693
PAAG_00588	fumarate hydratase 364 aa	4810.51	0.704688
PAAG_07729	isocitrate dehydrogenase subunit 2 342 aa	1188.02	Ctrl_2h
Glyoxylate cycle
PAAG_04542	malate synthase 540 aa	7394.14	0.778801	1344.85	2.29332
PAAG_06951	isocitrate lyase 538 aa			6624.44	0.810584
PAAG_04549	mitochondrial 2 methylisocitrate lyase 60	8962.62	0.748264	4003.29	0.895834
Methylcitrate cycle
PAAG_04550	2 methylcitrate synthase 470 aa	26990.8	0.843665	16022.9	1.50682
Pyruvate dehydrogenase complex
PAAG_03330	dihydrolipoyl dehydrogenase 522 aa	18603.9	1.08329	17342.5	1.2586
PAAG_01534	pyruvate dehydrogenase E1 component subun	14726.6	0.637628	13778.9	1.55271
PAAG_08295	pyruvate dehydrogenase E1 component subun			4312.12	1.16183
PAAG_00050	pyruvate dehydrogenase protein X componen			4497.21	1.15027
PAAG_02769	pyruvate dehydrogenase protein X componen	590.7	Inf_2h	1278.94	Inf_4h
Pentose-phosphate pathway
PAAG_01178	6 phosphogluconate dehydrogenase 492 aa	6965.15	0.810584	3180.28	1.39097
PAAG_05940	deoxyribose phosphate aldolase 280 aa			666.92	Ctrl_4h
PAAG_04166	transaldolase 325 aa			14718.3	1.55271
PAAG_04444	transketolase 686 aa	8021.92	0.83527	6682.49	0.860708
PAAG_01481	FGGY family carbohydrate kinase 617 aa	674.31	Ctrl_2h
Electron transport and membrane-associated energy conservation
PAAG_06595	3 demethylubiquinone 9 3 methyltransferas			2343.84	1.09417
PAAG_03631	12 oxophytodienoate reductase 396 aa			10072.9	0.941765
PAAG_07285	vacuolar ATP synthase catalytic subunit A	2238.09	0.733447	462.71	1.99372
PAAG_06288	vacuolar ATP synthase subunit B 507 aa	979.35	Inf_2h	448.4	Inf_4h
PAAG_06155	vacuolar ATP synthase subunit E 240 aa			2523.86	Ctrl_4h
PAAG_03668	vacuolar ATP synthase subunit F 125 aa			1009.06	Ctrl_4h
PAAG_04570	ATP synthase D chain mitochondrial 175 a			6828.27	0.913931
PAAG_05605	ATP synthase delta chain 166 aa	4776.94	Inf_2h	9150.56	0.66365
PAAG_05576	ATP synthase gamma chain 298 aa	16473.7	0.631284	17824.8	0.66365
PAAG_04838	ATP synthase subunit 4 245 aa	1455.12	Inf_2h	1379.83	Inf_4h
PAAG_06206	ATP synthase subunit 5 231 aa	788.81	Ctrl_2h
PAAG_08037	ATP synthase subunit beta 514 aa	60351.3	1.11628	59337.6	0.650509
PAAG_04820	ATPase alpha subunit 466 aa	21075.8	0.83527	28714.8	0.878095
PAAG_08088	cytochrome b c1 complex subunit 2 464 aa			1493.54	1.15027
PAAG_06268	cytochrome c 112 aa			1373.47	1.56831
PAAG_06093	cytochrome c1 323 aa	946.96	Ctrl_2h
PAAG_01265	cytochrome b5	1120.81	9.87494	4061.75	4.01485
PAAG_07672	ubiquinol-cytochrome c reductase subunit 7	7656.62	Ctrl_2h	7804.24	Ctrl_4h
PAAG_00657	inorganic pyrophosphatase 295 aa			9040.56	0.895834
PAAG_06796	cytochrome c oxidase subunit 4, mitochondrial	620.05	Ctrl_2h
PAAG_07246	cytochrome c oxidase subunit VI	22244.7	1.16183	33273.3	0.99005
Fermentation
PAAG_00403	alcohol dehydrogenase 355 aa	4878.41	0.794534	4100.1	1.0202
PAAG_03910	aldehyde dehydrogenase 472 aa	1304.33	Ctrl_2h
PAAG_05249	aldehyde dehydrogenase 497 aa			8839.02	1.24608
Respiration
PAAG_00173	electron transfer flavoprotein subunit al	6869.75	0.588605	5761.69	0.869358
PAAG_04931	electron transfer flavoprotein subunit be	5092	0.778801	8865.75	0.71177
PAAG_00953	NADH cytochrome b5 reductase 334 aa			1041.53	Inf_4h
PAAG_03309	suaprga1 307 aa			2875.94	1.52196
PAAG_00297	F1F0-ATP synthase regulatory factor Stf2,			8863.98	0.913931
CELL CYCLE AND DNA PROCESSING
PAAG_08917	histone H2a 136 aa	1546.12	Inf_2h
PAAG_08471	histone H2A Z 139 aa	2068.3	Ctrl_2h
PAAG_07099	histone H3 3 137 aa	890.01	8.67114	1207.85	15.0293
PAAG_07098	histone H4 1 104 aa			5861.19	8.00447
PAAG_00126	histone H4 2 104 aa	2703.21	4.52673	5168.47	Inf_4h
PAAG_08918	late histone H2B L4 142 aa	2605.25	9.48774	3404.69	5.10387
PAAG_02230	cell division control protein 193 aa			1476.71	Ctrl_4h
PAAG_05518	cell division cycle protein 821 aa	11971.9	0.532592	6643.35	1.50682
PAAG_08074	clock controlled gene 9 protein 711 aa	961.82	Ctrl_2h
PAAG_06511	mitochondrial genome maintenance protein	2533.01	Ctrl_2h
PAAG_04458	prohibitin 1 281 aa			1116.52	3.18993
PAAG_00923	proliferating cell nuclear antigen 282 aa			22991.9	0.826959
PAAG_07339	S phase kinase associated protein 1A 170			3757.53	2.38691
PAAG_02522	U4/U6-U5 snRNP complex subunit LSM3	2616.42	Inf_2h	2243.15	1.17351
PAAG_04949	UV excision repair protein Rad23			2693.36	0.941765
TRANSCRIPTION
PAAG_03652	cap binding protein 832 aa	1193.21	Ctrl_2h
PAAG_03941	G4 quadruplex nucleic acid binding protei	842.83	Ctrl_2h
PAAG_03783	GAF domain nucleotide binding protein 213	1660.08	Ctrl_2h
PAAG_02255	mRNA decapping hydrolase 319 aa			1619.71	1.2214
PAAG_04496	nascent polypeptide associated complex su			618.01	Ctrl_4h
PAAG_04571	nascent polypeptide associated complex su	2821.62	Inf_2h	944.78	1.39097
PAAG_04726	pirin 316 aa			3246.21	1.06184
PAAG_01710	polymerase II polypeptide D 153 aa	1128.23	Ctrl_2h
PAAG_03710	mRNA splicing protein SME1	1190.8	Ctrl_2h
PAAG_06565	pre mRNA splicing factor ini1 111 aa			1629.41	Ctrl_4h
PAAG_04637	pre mRNA splicing factor rse1 1210 aa	668.62	Ctrl_2h
PAAG_01736	ran GTPase activating protein 498 aa	798.38	Ctrl_2h
PAAG_02466	ran specific GTPase activating protein 16	22261.5	0.522046	30250.1	0.778801
PAAG_01630	small nuclear ribonucleoprotein LSM2 99 a	3522.85	0.650509	2272.62	1.11628
PAAG_02537	small nuclear ribonucleoprotein Sm D2 115	2601.98	Ctrl_2h	986.06	0.201897
PAAG_03030	splicing factor U2AF associated protein 3	692.93	Ctrl_2h
PAAG_02437	U2 small nuclear ribonucleoprotein B 254	1660.54	Ctrl_2h
PAAG_00845	LSM domain containing protein 85 aa			12807.7	1.34986
PAAG_08234	transcription factor RfeF			2637.72	1.68203
PAAG_00847	RNA methylation protein TRM112			553.61	Ctrl_4h
PAAG_01042	cleavage stimulation factor subunit 2			521.1	Ctrl_4h
PROTEIN SYNTHESIS
PAAG_06367	30S ribosomal protein S17P 162 aa	5693.42	0.477114	7358.42	1.16183
PAAG_02111	40S ribosomal protein S0 296 aa	16049.9	0.704688	13499.5	0.733447
PAAG_05017	40S ribosomal protein S10 A 166 aa	3359.26	0.83527	2640.94	0.980199
PAAG_08634	40S ribosomal protein S12 152 aa	1056.59	Inf_2h	1352.36	1.71601
PAAG_05704	40S ribosomal protein S13 1 152 aa	11821.5	0.733447	8064.04	0.740818
PAAG_01433	40S ribosomal protein S14 152 aa	6079.82	0.683861	10757	1.05127
PAAG_04690	40S ribosomal protein S15 154 aa			20017.8	1.49182
PAAG_01435	40S ribosomal protein S16 144 aa			5681.03	0.740818
PAAG_01413	40S ribosomal protein S17 143 aa	10167	1.27125	8058.26	1.0202
PAAG_03513	40S ribosomal protein S18 156 aa	12629.8	1.36343	15025.4	1.2586
PAAG_05778	40S ribosomal protein S19 147 aa			12338.7	0.941765
PAAG_09043	40S ribosomal protein S2 261 aa	8377.41	0.477114	9507	0.677057
PAAG_03322	40S ribosomal protein S20 117 aa			3289.97	0.99005
PAAG_05805	40S ribosomal protein S21 89 aa	2170.98	2.2034	6256.4	1.13883
PAAG_05337	40S ribosomal protein S22 131 aa	7360.93	0.794534	15699.5	0.491644
PAAG_00385	40S ribosomal protein S23 146 aa			803.7	Ctrl_4h
PAAG_06882	40S ribosomal protein S24 135 aa	8118.43	Ctrl_2h	13835	Ctrl_4h
PAAG_08540	40S ribosomal protein S25 158 aa	1090.62	Inf_2h
PAAG_07847	40S ribosomal protein S26 122 aa	16543.8	0.600496	18525.8	0.771052
PAAG_01785	40S ribosomal protein S3 271 aa	15397.7	1.44773	12567.3	1.17351
PAAG_08955	40S ribosomal protein S3aE 256 aa			16978	1.2214
PAAG_03816	40S ribosomal protein S4 263 aa	6643.12	0.588605	7565.89	1.11628
PAAG_05484	40S ribosomal protein S5 215 aa			12951.8	1.06184
PAAG_07182	40S ribosomal protein S7 202 aa			32138.4	0.600496
PAAG_00264	40S ribosomal protein S8 B 203 aa	12069.5	0.511709	18965.2	0.878095
PAAG_03828	40S ribosomal protein S9 192 aa	4421.29	0.818731	5508.92	0.88692
PAAG_08285	50S ribosomal protein L12 199 aa			2473.37	1.09417
PAAG_02553	54S ribosomal protein YmL6 347 aa	2764.95	Ctrl_2h	777.5	Ctrl_4h
PAAG_00801	60S acidic ribosomal protein P0 lyase 314			2825.87	3.03436
PAAG_01052	60S ribosomal protein L10 B 224 aa			25149.9	0.740818
PAAG_07707	60S ribosomal protein L10a 230 aa			3307.02	1.73325
PAAG_05590	60S ribosomal protein L12 166 aa	14140.6	0.869358	7538.02	1.29693
PAAG_06320	60S ribosomal protein L13 218 aa	4642.12	0.227638
PAAG_00969	60S ribosomal protein L15 204 aa	4015.15	Ctrl_2h	7902.53	0.57695
PAAG_01834	60S ribosomal protein L16 203 aa			5050	1.07251
PAAG_05379	60S ribosomal protein L17 185 aa	4533.11	1.58407	3656.81	1.69893
PAAG_07955	60S ribosomal protein L18 190 aa	6431.56	0.427415	10181.9	0.463013
PAAG_08497	60S ribosomal protein L19 192 aa	10343.8	Ctrl_2h
PAAG_00430	60S ribosomal protein L2 255 aa	14064.5	0.280832	19318.6	0.559898
PAAG_00952	60S ribosomal protein L20 175 aa	9764.44	0.501576
PAAG_03827	60S ribosomal protein L21 A 161 aa	18895.7	0.423162	19542.2	0.763379
PAAG_04425	60S ribosomal protein L22 123 aa			15715.9	0.923116
PAAG_07385	60S ribosomal protein L23a 154 aa	9688.31	0.26982	10275.4	0.496585
PAAG_05233	60S ribosomal protein L26 135 aa	2696.66	Ctrl_2h	5792.09	Ctrl_4h
PAAG_01939	60S ribosomal protein L27 A 136 aa	2327.65	Ctrl_2h	6572.29	Ctrl_4h
PAAG_08847	60S ribosomal protein L28 150 aa	845.39	Inf_2h	1341.68	1.2586
PAAG_00088	60S ribosomal protein L3 393 aa	4382.07	0.704688	10948.9	1.07251
PAAG_06627	60S ribosomal protein L32 132 aa	6417.95	0.537944	6417.95	0.537944
PAAG_06792	60S ribosomal protein L34 B 121 aa	3747.94	Ctrl_2h	3029.95	0.453845
PAAG_08888	60S ribosomal protein L4 A 373 aa			15630.9	0.313486
PAAG_06569	60S ribosomal protein L43 93 aa			9897.64	Ctrl_4h
PAAG_00548	60S ribosomal protein L5 300 aa			15363.7	1.08329
PAAG_03019	60S ribosomal protein L6 B 205 aa	4347.03	1.40495	3526.95	0.895834
PAAG_06487	60S ribosomal protein L7 C 249 aa	7181.62	0.690734	7797.62	0.66365
PAAG_04998	60S ribosomal protein L8 B 262 aa			13287.6	0.559898
PAAG_00347	60S ribosomal protein L9 B 193 aa	8087.53	0.733447	11490.7	0.810584
PAAG_00205	60S ribosomal protein L24			7876.76	Ctrl_4h
PAAG_01001	40S ribosomal protein S29	1071.41	Ctrl_2h
PAAG_03664	50S ribosomal protein L28e			6104.6	0.913931
PAAG_09096	40S ribosomal protein S28	25278	0.239309	27799.5	0.453845
PAAG_00724	ribosomal protein 11 large subunit 176 aa			11840	0.71177
PAAG_06743	ribosomal protein L23e 141 aa	6577.25	Ctrl_2h	4262.78	Ctrl_4h
PAAG_02889	ribosomal protein L35 126 aa	1027.6	Inf_2h	1900.46	Ctrl_4h
PAAG_02634	ribosomal protein S6 238 aa			9985.49	1.05127
PAAG_00765	60S ribosomal protein L36	16777.2	0.418952	11635.9	0.740818
PAAG_07841	60S acidic ribosomal protein P1	27061.8	1.16183	33586.4	1.55271
PAAG_06970	mitochondrial 37S ribosomal protein RSM24	828.99	Ctrl_2h
PAAG_01731	mitochondrial 54S ribosomal protein YmL37	785.65	Ctrl_2h
PAAG_01050	cytosolic large ribosomal subunit protein	7281.94	0.600496	13153.2	0.625002
PAAG_00240	eukaryotic translation initiation factor	3496.74	1.93479	4251.66	2.36316
PAAG_04958	eukaryotic translation initiation factor			1126.62	2.117
PAAG_06084	eukaryotic translation initiation factor	2568.27	0.697676	948.6	1.78604
PAAG_08348	eukaryotic translation initiation factor	1260.28	0.431711	728.11	Inf_4h
PAAG_00689	ATP dependent RNA helicase eIF4A 399 aa	1252.91	5.98945	2249.55	Inf_4h
PAAG_04511	ATP dependent RNA helicase SUB2 468 aa	832.16	Inf_2h
PAAG_02024	elongation factor 1 alpha 461 aa	33947.7	1.56831	7548.89	2.29332
PAAG_03028	elongation factor 1 beta 233 aa			15183.9	1.87761
PAAG_03556	elongation factor 1 gamma 1 408 aa			2115.4	5.7546
PAAG_00594	elongation factor 2 832 aa	16404.4	0.923116	4047.29	3.93535
PAAG_03167	elongation factor G 1 798 aa	586.09	Ctrl_2h
PAAG_02921	elongation factor Tu 442 aa	6555.42	0.83527	1874.04	1.80399
PAAG_01777	alanyl tRNA synthetase 963 aa	6313.91	0.606531	5998.32	0.860708
PAAG_00150	arginyl tRNA synthetase 585 aa			786.76	1.68203
PAAG_07349	glycyl tRNA synthetase 656 aa	1396.12	0.726149	2842.65	1.07251
PAAG_03572	glutaminyl tRNA synthetase 718 aa			2166.75	0.740818
PAAG_07028	histidyl tRNA synthetase 602 aa	2870.5	0.763379	915.47	2.38691
PAAG_07105	isoleucyl tRNA synthetase 1080 aa	1101.87	Ctrl_2h	827.7	1.15027
PAAG_04193	cysteinyl tRNA synthetase 821 aa	752.73	Ctrl_2h
PAAG_04742	valyl tRNA synthetase 1052 aa	4052.96	0.826959	896.85	1.47698
PAAG_02865	translation initiation factor RLI1 624 aa	916.53	Ctrl_2h
PAAG_01786	phenylalanyl tRNA synthetase beta chain 6	1778.33	Ctrl_2h
PAAG_03951	prolyl tRNA synthetase 639 aa			494.17	Inf_4h
PAAG_08702	seryl tRNA synthetase 489 aa	1412.01	0.71177	4297.79	0.249075
PAAG_01711	tRNA methyltransferase Trm5 480 aa	1907.35	Ctrl_2h	891.79	Ctrl_4h
PROTEIN FATE
PAAG_00768	peptidase family protein 443 aa			807	Ctrl_4h
PAAG_05788	peptidyl prolyl cis trans isomerase A2 25	7680.58	0.594521	7493.82	0.66365
PAAG_00739	peptidyl prolyl cis trans isomerase B 211			9887.13	0.414783
PAAG_06168	peptidyl prolyl cis trans isomerase cypE			5713.62	0.763379
PAAG_03334	peptidyl prolyl cis trans isomerase D 374	29548.9	0.860708	34318.9	0.826959
PAAG_01778	peptidyl prolyl cis trans isomerase H 181	1819.66	Ctrl_2h
PAAG_00852	proteasome component C1 348 aa			2817.03	1.1853
PAAG_00866	proteasome component C5 267 aa			2420.76	1.08329
PAAG_01941	proteasome component C7 alpha 329 aa			6772.51	0.960789
PAAG_01150	proteasome component PRE2 284 aa	5209.17	0.83527	6300.66	0.932394
PAAG_08418	proteasome component PRE3 215 aa			2845.43	0.970446
PAAG_00868	proteasome component PRE4 261 aa			804.7	1.07251
PAAG_03536	proteasome component PRE5 267 aa	3220.52	1.27125	2936.59	1.1275
PAAG_07802	proteasome component PRE6 270 aa	6777.95	1.36343	6003.98	1.23368
PAAG_01104	proteasome component PUP1 277 aa			8761.28	1.09417
PAAG_03687	proteasome component PUP2 246 aa	5126.04	1.66529	3431.85	1.27125
PAAG_00071	proteasome component Y7 277 aa			2392.24	1.08329
PAAG_08141	proteasome subunit alpha type 4 252 aa			4654.84	1.06184
PAAG_09004	puromycin sensitive aminopeptidase 899 aa	3918.75	0.612626	3272.5	0.786628
PAAG_04205	vacuolar aminopeptidase 518 aa			1284.7	0.913931
PAAG_07500	xaa Pro aminopeptidase 469 aa	1043.43	Ctrl_2h
PAAG_07319	xaa Pro aminopeptidase 699 aa	2462.73	Ctrl_2h	1265.21	Ctrl_4h
PAAG_00664	aspartyl aminopeptidase 607 aa			920.97	1.84043
PAAG_03279	aminopeptidase 658 aa			2551.28	0.960789
PAAG_03719	metalloendopeptidase			1496.1	0.83527
PAAG_01926	26S protease regulatory subunit 6A			649.55	2.77319
PAAG_08931	glutamate carboxypeptidase 579 aa			6157.94	0.970446
PAAG_07467	dipeptidyl peptidase 773 aa	2361.19	0.818731	1231.73	0.826959
PAAG_00986	disulfide isomerase Pdi1 539 aa	27315.5	0.748264	30772	0.932394
PAAG_05643	endoplasmic reticulum and nuclear membran	20623.6	0.588605	18308.3	0.913931
PAAG_05107	AAA ATPase 921 aa	579.59	Ctrl_2h
PAAG_08184	T complex protein 1 epsilon subunit 569 a	1590.79	Ctrl_2h	567.87	Inf_4h
PAAG_06068	T complex protein 1 subunit beta 555 aa			2039.31	Inf_4h
PAAG_01727	T complex protein 1 subunit delta 511 aa			493.75	Inf_4h
PAAG_07851	T complex protein 1 subunit eta 564 aa			595.7	Inf_4h
PAAG_07165	T complex protein 1 subunit gamma 539 aa	1708.27	2.53451	926.09	Inf_4h
PAAG_03932	E1 ubiquitin-activating protein UBA1			720.12	2.07508
PAAG_06536	ubiquitin 155 aa	14106.8	1.58407	30475.3	1.50682
PAAG_00238	ubiquitin 219 aa	7897.75	Ctrl_2h
PAAG_04327	ubiquitin carboxyl terminal hydrolase 112	682.86	Ctrl_2h
PAAG_00295	ubiquitin carboxyl terminal hydrolase 784	585.61	Ctrl_2h	798.37	Ctrl_4h
PAAG_04901	ubiquitin conjugating enzyme 252 aa			3594.14	1.32313
PAAG_02773	ubiquitin conjugating enzyme variant MMS2	1768.81	Inf_2h
PAAG_03038	ubiquitin like modifier SUMO 94 aa	809.15	Inf_2h
PAAG_00367	ubiquitin-binding protein CUE5	1645.58	Ctrl_2h	538.82	Ctrl_4h
PAAG_07890	vacuolar sorting protein snf7 223 aa	3560.46	Ctrl_2h
PAAG_07037	calnexin 568 aa	2454.18	0.748264	1276.56	1.1275
PAAG_03533	Hsp70 nucleotide exchange factor fes1 226			1203.08	Ctrl_4h
PAAG_07849	metacaspase 1 384 aa			367.55	Ctrl_4h
PAAG_06255	mitochondrial co chaperone GrpE 254 aa			8327.6	1.03045
PAAG_09072	mitochondrial nuclease 336 aa			1052.2	2.77319
PAAG_05417	mitochondrial processing peptidase subuni			5570.86	0.932394
PAAG_00797	mitochondrial protein import protein MAS5			618.62	2.4109
PAAG_07490	monothiol glutaredoxin 5 160 aa	1492.76	1.59999
PAAG_01650	monothiol glutaredoxin 5 277 aa	539.84	Ctrl_2h
PAAG_01588	SNARE Ykt6 227 aa			507.68	Inf_4h
CELLULAR TRANSPORT, TRANSPORT FACILITIES AND TRANSPORT ROUTES
PAAG_04651	GTP binding nuclear protein GSP1 Ran 216			2492.33	7.84597
PAAG_08028	GTP binding protein ypt1 202 aa			4126.31	1.28403
PAAG_02458	GTP binding protein ypt7 206 aa	1749.94	5.15517	2446.88	Inf_4h
PAAG_08954	GTP cyclohydrolase 501 aa	1574.33	Ctrl_2h
PAAG_02820	GTP dependent nucleic acid binding protei	1057.48	Ctrl_2h
PAAG_07111	cyclin dependent kinase B1 1 407 aa	647.39	Ctrl_2h
PAAG_07773	cyclin dependent kinases regulatory subun	839.65	Inf_2h
PAAG_02973	diploid state maintenance protein chpA 31			3609.91	0.960789
PAAG_06233	vesicular fusion protein SEC17 293 aa			1208.71	1.34986
PAAG_03953	WD repeat containing protein 425 aa	639.51	Ctrl_2h
PAAG_03649	WD repeat containing protein 593 aa			2042.67	1.17351
PAAG_06751	DNA damage checkpoint protein rad24 266 a			36294.6	1.53726
PAAG_00773	DNA damage checkpoint protein rad24 293 a			24464.7	1.75067
PAAG_01947	ATPase GET3 342 aa	684.47	Ctrl_2h
PAAG_02019	F-type H+-transporting ATPase subunit H			4490.94	0.726149
PAAG_06878	V-type ATPase, G subunit			984.64	Ctrl_4h
PAAG_02467	ran-specific GTPase-activating protein 1	2894.47	Ctrl_2h
PAAG_08252	clathrin light chain 249 aa			2095.12	0.923116
PAAG_03445	kinesin heavy chain 1023 aa			400.38	Ctrl_4h
PAAG_08697	myosin 2 2021 aa	504.3	Inf_2h	733.47	Inf_4h
PAAG_07185	actin like protein 2/3 complex, subunit 5			612.17	Ctrl_4h
PAAG_03717	myosin regulatory light chain cdc4 140 aa	3122.03	Ctrl_2h	3066.73	0.83527
PAAG_05960	NIPSNAP family protein 410 aa	9239.23	0.810584	6733.49	0.690734
PAAG_03188	nuclear movement protein nudC 199 aa	13017.4	0.748264	12124.3	1.24608
PAAG_02186	nuclear segregation protein Bfr1 505 aa	1144.93	1.59999	583.73	1.33643
PAAG_07564	outer mitochondrial membrane protein pori	1497.73	1.71601	1514.36	Inf_4h
PAAG_07900	phosphatidylinositol phosphatidylcholine			951.69	Inf_4h
PAAG_04276	phosphatidylinositol transporter 461 aa	4674.18	0.860708	2291.86	1.53726
PAAG_08082	plasma membrane ATPase 930 aa			536.84	1.56831
PAAG_00326	iron/copper transporter Atx1	18073.8	Ctrl_2h
CELLULAR COMMUNICATION/SIGNAL TRANSDUCTION MECHANISM
PAAG_06344	rab GDP dissociation inhibitor 469 aa			2510.33	Inf_4h
PAAG_02377	rho GDP dissociation inhibitor 186 aa	6597.71	0.718924	4690.15	0.878095
PAAG_00782	small COPII coat GTPase sar1 190 aa	2941.92	2.53451	2766.75	Inf_4h
PAAG_07634	small GTPase RhoA 192 aa	22225.1	0.704688	14067.6	1.2214
PAAG_06996	G protein comlpex beta subunit CpcB 317 a			20178	1.01005
PAAG_01280	ser Thr protein phosphatase family protei			707.54	Inf_4h
PAAG_00783	serine threonine protein phosphatase PP1	695.92	Ctrl_2h
BIOGENESIS OF CELLULAR COMPONENTS
PAAG_00564	actin 390 aa	604.25	Inf_2h
PAAG_02396	actin 441 aa	3607.76	0.606531	736.48	Inf_4h
PAAG_00004	actin binding protein 582 aa	3722.17	Ctrl_2h	1370.04	Ctrl_4h
PAAG_01347	actin cytoskeleton protein VIP1 267 aa			8839.02	1.49182
PAAG_00997	actin interacting protein 614 aa			839.36	Ctrl_4h
PAAG_06192	ARP2 3 complex 20 kDa subunit 170 aa	3219.42	0.431711	1486.93	1.11628
PAAG_05663	ARP2 3 complex 34 kDa subunit 319 aa	1268.4	Ctrl_2h
PAAG_03624	Arp2 3 complex subunit Arc16 314 aa	828.45	1.50682
PAAG_00622	mitochondria fission 1 protein 154 aa	661.33	Ctrl_2h
PAAG_08973	tropomyosin 1 162 aa	10445.4	1.41907	16919.4	0.970446
PAAG_07150	UDP galactopyranose mutase 521 aa	2925.09	0.683861
PAAG_06885	UDP N acetylglucosamine pyrophosphorylase	2630.13	0.704688	2370.79	0.980199
PROTEIN WITH BINDING FUNCTION OR COFACTOR REQUIREMENT
PAAG_08620	ADP ATP carrier protein 310 aa			1479.12	Inf_4h
PAAG_00501	ADP ribose pyrophosphatase 216 aa			1826.97	Ctrl_4h
PAAG_01452	ADP ribosylation factor 171 aa	628.13	Ctrl_2h
PAAG_07702	ADP ribosylation factor 184 aa			4294.32	0.571209
PAAG_06574	curved DNA binding protein 42 kDa protein	1377.89	Ctrl_2h
PAAG_06886	zinc finger protein GIS2 223 aa			2325.13	Ctrl_4h
PAAG_03551	calcineurin subunit B 190 aa	2654.7	Ctrl_2h
PAAG_08247	calmodulin 150 aa	22326.5	1.40495	12134.5	1.59999
PAAG_07887	cAMP dependent protein kinase regulatory	1204.54	Ctrl_2h
PAAG_03640	CCR4 Not complex subunit Caf16 273 aa	1252.29	Ctrl_2h
PAAG_09122	FK506 binding protein 141 aa			4799.3	Ctrl_4h
PAAG_05827	glycolipid transferprotein HET C2 209 aa	623.08	1.99372	392.21	3.18993
PAAG_01424	iron binding protein erpA 113 aa	715.5	Ctrl_2h
PAAG_07409	tubulin-binding prefolding complex subunit YKE2			1584.13	0.904837
PAAG_06917	KH domain RNA binding protein 365 aa			424.32	2.36316
PAAG_02352	molybdopterin binding domain containing p	857.65	Ctrl_2h	625.53	Ctrl_4h
PAAG_04814	nucleic acid binding protein 274 aa	2334.7	1.37713	5535.65	1.0202
PAAG_00244	polyadenylate binding protein 823 aa	1543.67	0.83527	1008.67	2.48432
PAAG_01097	PolyrC binding protein 496 aa			691.9	Inf_4h
PAAG_04391	progesterone binding protein 123 aa			4834.13	0.895834
PAAG_08703	rheb small monomeric GTPase RhbA 264 aa	1260.16	Ctrl_2h
CELL RESCUE, DEFENSE AND VIRULENCE
Stress response
PAAG_08059	heat shock protein 60, mitochondrial 593 aa	63936.1	1.17351	94762.2	1.2586
PAAG_05679	heat shock protein 90 696 aa	10124.1	1.40495	2445.18	8.75828
PAAG_07750	heat shock protein Hsp88 728 aa	25035.6	0.718924	33245	0.923116
PAAG_02130	heat shock protein HSP98 927 aa	454.65	Inf_2h	495.7	Inf_4h
PAAG_07775	heat shock protein SSB1 558 aa			4119.21	1.84043
PAAG_01339	heat shock protein SSC1 681 aa			32493.3	1.13883
PAAG_06811	heat shock protein STI1 579 aa	4905.25	1.27125	5090.56	1.58407
PAAG_00871	30 kDa heat shock protein 259 aa			4448.36	1.11628
PAAG_05142	10 kDa heat shock protein mitochondrial	38028.7	0.771052	80806.1	0.57695
PAAG_01262	hsp70 like protein 629 aa	5428.19	1.1853	9929.8	2.07508
PAAG_08003	hsp70 like protein 655 aa	80185.1	0.913931	99072.4	0.778801
PAAG_03292	cytochrome c peroxidase 375 aa			14778.7	0.704688
PAAG_06947	gamma glutamyltranspeptidase 594 aa			1230.24	Ctrl_4h
PAAG_05226	Hsp90 binding co chaperone Sba1 197 aa			1082.55	1.27125
PAAG_02686	Hsp90 co chaperone AHA1 330 aa	603.4	Ctrl_2h	445.02	2.09594
PAAG_08260	Hsp90 co chaperone Cdc37 508 aa	3215.48	1.69893	1060.07	2.85765
Detoxification
PAAG_01454	peroxissomal catalase 290 aa	3725.29	1.78604	4819.99	1.15027
PAAG_02364	thioredoxin 117 aa	42913	0.878095	42773.8	1.17351
PAAG_07020	thioredoxin reductase 359 aa			1323.23	Ctrl_4h
PAAG_04164	superoxide dismutase [Cu-Zn] 155 aa			7273.6	1.10517
PAAG_02725	superoxide dismutase [Fe-Mn] 228 aa			2586.35	3.78104
PAAG_02926	superoxide dismutase [Fe-Mn] 249 aa			965.4	1.41907
MISCELLANEOUS
PAAG_00566	aflatoxin B1 aldehyde reductase member 2			1064.68	1.05127
PAAG_02802	ankyrin repeat containing protein 215 aa	780.58	Ctrl_2h
PAAG_01704	SAM dependent methyltransferase UbiE COQ5			662.7	Ctrl_4h
PAAG_08992	type 2A phosphatase activator tip41 243 a	877.44	Ctrl_2h
UNCLASSIFIED
PAAG_01935	formyl coenzyme A transferase 450 aa	1666.83	0.67032
PAAG_06083	dienelactone hydrolase family protein 246	5374.49	0.67032	3514.51	0.88692
PAAG_04478	dienelactone hydrolase family protein 291	5434.47	1.16183	4204.02	1.13883
PAAG_02665	bifunctional 4-hydroxy-4-methyl-2-oxoglutarate aldolase/oxaloacetate decarboxylase	700.98	Inf_2h	551.67	Ctrl_4h
PAAG_06515	DUF833 domain containing protein 321 aa	8513.61	Ctrl_2h	2348.46	Ctrl_4h
PAAG_00932	dynein light chain 95 aa			1512.92	Inf_4h
PAAG_02567	EF hand superfamily Ca2 modulated protei	1014.82	Ctrl_2h
PAAG_03701	BAR domain containing protein 307 aa			7238.62	0.904837
PAAG_03152	CobW domain containing protein 434 aa			436.09	3.35348
PAAG_08313	L PSP endoribonuclease family protein Hmf	37221.2	1.2214	54360.9	1.01005
PAAG_01399	NAD dependent epimerase dehydratase famil			2069	1.82212
PAAG_04851	fumarate reductase Osm1			6083.37	0.904837
PAAG_07573	predicted protein 141 aa			671	Inf_4h
PAAG_03106	ThiJ PfpI family protein 233 aa			6822.12	1.1275
PAAG_02217	isochorismatase domain containing protein			14972.1	0.941765
PAAG_03537	lysine decarboxylase-like protein			4968.03	1.46228
PAAG_08179	RING superfamily domain-containing protein	1087.27	Ctrl_2h	1015.05	Ctrl_4h
PAAG_01539	SNF7 family protein Fti1/Did2, variant	1727.3	Ctrl_2h	484.51	Ctrl_4h
PAAG_07792	secondary thiamine-phosphate synthase enzyme	8547.98	Ctrl_2h
PAAG_01045	NIF3-like protein			467.04	Ctrl_4h
PAAG_05701	putative transformer-SR ribonucleo protein	945.03	Inf_2h
PAAG_08058	cofilin			2125.96	3.6693
PAAG_05019	Hnt1 cyclin dependent kinase Kin28 interacting protein	11759.5	0.748264	18701.9	1.39097
PAAG_03741	hydrolase-HD superfamily protein			4268.04	Ctrl_4h
PAAG_00503	HAD superfamily hydrolase 245 aa			3573.68	0.895834
PAAG_05864	COPII-coated vesicle protein	690.66	Ctrl_2h
PAAG_08693	Bot1p superfamily domain-containing protein, partial	1882.75	Ctrl_2h
PAAG_01572	zuotin			2687.7	0.763379
PAAG_02434	hypothetical protein 132 aa			1321.19	Ctrl_4h
PAAG_01591	hypothetical protein 149 aa	4091.65	1.52196	11602.5	1.04081
PAAG_06923	hypothetical protein 164 aa	546.88	Ctrl_2h
PAAG_05550	hypothetical protein 173 aa			1393.39	Ctrl_4h
PAAG_03239	hypothetical protein 177 aa			2155.76	Ctrl_4h
PAAG_02843	hypothetical protein 222 aa			866.96	0.904837
PAAG_05348	hypothetical protein 231 aa	1636.04	Ctrl_2h	2312.75	Ctrl_4h
PAAG_01776	hypothetical protein 241 aa			674.4	Ctrl_4h
PAAG_05822	hypothetical protein 256 aa			438.42	Ctrl_4h
PAAG_05224	hypothetical protein 282 aa	2388.38	0.644036	2224.32	0.951229
PAAG_00772	hypothetical protein 286 aa			1008.22	Inf_4h
PAAG_03092	hypothetical protein 587 aa	2800.76	0.810584	3054.46	1.39097
PAAG_01863	hypothetical protein 69 aa	2106.85	Ctrl_2h	2905.31	Ctrl_4h
PAAG_00573	hypothetical protein 71 aa	562.59	Inf_2h
PAAG_02828	hypothetical protein 79 aa	12074.8	0.414783
PAAG_06462	hypothetical protein 106 AA	1273.78	Inf_2h	5079.83	1.75067
PAAG_04647	conserved hypothetical protein 115 aa	573.85	Ctrl_2h
PAAG_01158	conserved hypothetical protein 121 aa	3760.38	1.39097	11573	1.07251
PAAG_03925	conserved hypothetical protein 121 aa	1346.8	Ctrl_2h
PAAG_07543	conserved hypothetical protein 121 aa			1477.94	Ctrl_4h
PAAG_03129	conserved hypothetical protein 144 aa			1470.99	Inf_4h
PAAG_07875	conserved hypothetical protein 161 aa	4399.39	1.64872	3836.2	1.24608
PAAG_07664	conserved hypothetical protein 163 aa			9388.52	1
PAAG_05856	conserved hypothetical protein 168 aa			3799.36	1.2586
PAAG_00340	conserved hypothetical protein 174 aa			3253.81	1.32313
PAAG_00350	conserved hypothetical protein 196 aa			514	Inf_4h
PAAG_07411	conserved hypothetical protein 196 aa	816.97	Ctrl_2h
PAAG_07772	conserved hypothetical protein 211 aa			7540.36	0.612626
PAAG_01327	conserved hypothetical protein 239 aa			619.6	Ctrl_4h
PAAG_06955	conserved hypothetical protein 289 aa			2405.82	1.55271
PAAG_00579	conserved hypothetical protein 298 aa	754.48	Ctrl_2h
PAAG_06851	conserved hypothetical protein 300 aa			2361.63	0.970446
PAAG_04274	conserved hypothetical protein 309 aa			1751.7	1.50682
PAAG_02336	conserved hypothetical protein 323 aa			1885.43	1.19722
PAAG_04913	conserved hypothetical protein 334 aa	14948.9	0.205975	13854.4	1.11628
PAAG_00904	conserved hypothetical protein 347 aa			400.54	Ctrl_4h
PAAG_08413	conserved hypothetical protein 348 aa	677.99	Ctrl_2h
PAAG_00335	conserved hypothetical protein 370 aa	727.96	Ctrl_2h	1105.78	Ctrl_4h
PAAG_01717	conserved hypothetical protein 414 aa	3596.53	Ctrl_2h
PAAG_02068	conserved hypothetical protein 450 aa			1746.28	Ctrl_4h
PAAG_07989	conserved hypothetical protein 485 aa			680.3	1.99372
PAAG_05547	conserved hypothetical protein 686 aa			400.59	Ctrl_4h
PAAG_02004	conserved hypothetical protein 908 aa	666.05	Ctrl_2h	596.27	0.644036
a Accession number from FungiDB Database (https://fungidb.org/fungidb/app, accessed on 26 September 2022).
b Protein description according to FungiDB Database (https://fungidb.org/fungidb/app, accessed on 26 September 2022).
c Expression values of differentially expressed P. lutzii proteins after 2 h and 4 h of neutrophil contact compared to those that were not incubated with neutrophils. Expression pattern was obtained via ProteinLynx Global Server and normalized with Phosphorylase B. Inf_2h and Inf_4h indicates that the protein was identified only after 2 h or 4 h, respectively, of neutrophil incubation compared to…
d Biological process according to FungiDB (https://fungidb.org/fungidb/, accessed on 26 September 2022), Uniprot (https://www.uniprot.org, accessed on 28 September 2022) and KEGG (https://www.genome.jp/pathway.html, 28 September 2022) databases.
